1 Regulation of multiple dimeric states of E-cadherin by adhesion activating antibodies  
2 revealed through Cryo-EM and X-ray crystallography

3 Allison Maker<sup>1,2</sup>, Madison Bolejack<sup>3,4</sup>, Leslayann Schecterson<sup>2</sup>, Brad Hammerson<sup>4,5</sup>,  
4 Jan Abendroth<sup>3,4</sup>, Tom E Edwards<sup>3,4</sup>, Bart Staker<sup>4,5</sup>, Peter J Myler<sup>4,5,6,7</sup>, Barry M  
5 Gumbiner<sup>1,2,6</sup>

- 6 1. University of Washington, Department of Biochemistry  
7 2. Center for Developmental Biology and Regenerative Medicine, Seattle Children's  
8 Research Institute  
9 3. UCB Pharma, Bainbridge, WA  
10 4. Seattle Structural Genomics Center for Infectious Disease  
11 5. Center for Global Infectious Disease Research, Seattle Children's Research  
12 Institute  
13 6. Department of Pediatrics, University of Washington  
14 7. Department of Biomedical Informatics & Medical Education, University of  
15 Washington  
16

## 17 **Abstract**

18 E-cadherin adhesion is regulated at the cell surface, a process that can be replicated by  
19 activating antibodies. We use cryo-EM and X-ray crystallography to examine functional  
20 states of the cadherin adhesive dimer. This dimer is mediated by N-terminal beta  
21 strand-swapping involving Trp2, and forms via a different transient X-dimer  
22 intermediate. X-dimers are observed in cryo-EM along with monomers and strand-swap  
23 dimers, indicating that X-dimers form stable interactions. A novel EC4-mediated dimer  
24 was also observed. Activating Fab binding caused no gross structural changes in E-  
25 cadherin monomers but can facilitate strand swapping. Moreover, activating Fab  
26 binding is incompatible with the formation of the X-dimer. Both cryo-EM and X-ray  
27 crystallography reveal a distinctive twisted strand-swap dimer conformation caused by

28 an outward shift in the N-terminal beta strand that may represent a strengthened state.  
29 Thus, regulation of adhesion involves changes in cadherin dimer configurations.

## 30 **Introduction**

31 E-cadherin is a cell-cell adhesion protein<sup>1-5</sup> that forms adherens junctions  
32 between epithelial cells. Dynamic regulation of cadherins at the cell surface makes them  
33 vital to proper tissue morphogenesis<sup>2,4,6</sup> and is implicated in barrier function during  
34 inflammation<sup>7,8</sup> and in metastatic cancer<sup>9-16</sup> when junctions are dysregulated.

35 A number of functional monoclonal antibodies (mAbs) to human E-cadherin  
36 extracellular domains have been identified that can activate, block adhesion, or  
37 distinguish between activation states of cell adhesion<sup>17,18</sup>. The group of activating mAbs  
38 has broad potential for therapeutic use: E-cadherin activating antibodies have been  
39 shown to decrease the number of metastatic nodules in mouse models of breast  
40 cancer<sup>19,20</sup> and can also decrease the disruption of barrier function and inflammation in  
41 mouse models of inflammatory bowel disease<sup>8</sup>. Other than the general location of  
42 epitopes on the E-cadherin extracellular domain<sup>17</sup>, the structural mechanism of  
43 activation resulting from these antibodies is as yet unknown. Understanding how these  
44 antibodies modulate E-cadherin function at the structural level would provide important  
45 insights into the mechanisms regulating the adhesive bond and have implications for  
46 development of potential therapeutics.

47 Although the mechanism underlying regulation of the cadherin adhesive bond at the  
48 cell surface is not well understood, a body of structural knowledge exists about the  
49 pathway underlying adhesive bond formation by individual cadherins. E-cadherin is a  
50 Type I classical cadherin, with 5 extracellular cadherin (EC) repeat domains with

51 calcium binding sites between each, followed by a linker region, a single-pass alpha  
52 helical transmembrane domain, and a cytoplasmic tail<sup>3,21,22</sup> complexed with  $\alpha$ -,  $\beta$ -, and  
53 p120-catenin linking the cadherin to the cytoskeleton<sup>23,24</sup>. Cell adhesion is thought to  
54 occur through *trans* dimers between cadherins on opposing cells. *Cis* interactions  
55 between cadherins on the same cell have also been proposed to occur, forming a lattice  
56 proposed to form the adherens junction<sup>22,25,26</sup>, but mutations that block the *cis*  
57 interaction do not interfere with either cell adhesion<sup>22</sup> or adherens junction formation<sup>27</sup>,  
58 and catenins<sup>28</sup> and the transmembrane domain may also be involved<sup>29</sup> in adherens  
59 junction assembly; thus the functional role of the *cis* dimer is unclear.

60 The stable final form of the *trans* interaction is thought to be mediated by the “strand-  
61 swap” dimer, named because it is mediated by the N-terminal beta strand in EC1  
62 participating in a domain swap with the similar strand in the opposing cadherin EC1<sup>22,30–</sup>  
63 <sup>33</sup>. The Trp2 residue of that strand in the monomer leaves a hydrophobic pocket in its  
64 own EC1 to enter the hydrophobic pocket of the opposing EC1 to form the dimer. The  
65 initial encounter complex during adhesive bond formation is thought to be via an  
66 intermediate in the monomer to strand-swap dimer transition, known as the X-dimer<sup>31,33–</sup>  
67 <sup>35</sup>. This dimer is formed from an interface between EC1s, including a vital salt bridge  
68 between K14 and D138<sup>31</sup> in the opposing EC1. This transition state brings the beta  
69 strands and Trp2 residues in proximity to each other, creating a favorable environment  
70 for the strand-swapping to take place. The Trp2 residues in the X-dimer are thought to  
71 flip to form a strand-swapped X-dimer<sup>33</sup>, and then this extends into the full strand-swap  
72 dimer<sup>31–33</sup>. Blocking the necessary salt bridge by mutating either K14 or D138 blocks the  
73 X intermediate, and these mutants are completely defective in cell adhesion.

74 It is important to note that all structures of the X-dimer to date have been of strand-  
75 swap deficient mutants; as of yet, this complex has not been observed in wild-type (WT)  
76 cadherins. As such, the X-dimer is thought to be a low-affinity state, as exhibited by the  
77 mutants<sup>31,33</sup>, but it is difficult to know the prevalence of wild-type X- or strand-swap-X-  
78 dimers without observing them in solution.

79 In this work, we use cryo-EM and X-ray crystallography to explore the nature of E-  
80 cadherin dimer formation, as well as examine how dimerization is impacted by the  
81 binding of functional antibodies. Cryo-EM provides a way to observe dimer forms in  
82 solution in equilibrium without constraints imposed by crystallization or crystal packing.  
83 The activating and other antibodies bound to E-cadherin offer a means to examine how  
84 dimer forms are influenced by functional perturbation of the adhesive state, providing  
85 insights into possible mechanisms for enhancing E-cadherin adhesion.

86

## 87 **Results**

### 88 **Multiple E-cadherin dimer conformations revealed by cryo-EM**

89 In order to visualize cadherins in their most biologically relevant state, full-length  
90 human E-cadherin was purified and inserted into nanodiscs<sup>36,37</sup>, preserving both the  
91 transmembrane and cytoplasmic domains along with the extracellular domain. Samples  
92 were then vitrified in 1 mM Ca<sup>2+</sup>-containing buffer and examined with cryo-EM. Some  
93 samples were also prepared with fully reconstituted E-cadherin-catenin protein  
94 complexes in nanodiscs, as described in a recent methodical study<sup>38</sup>. In the cadherin-  
95 catenin datasets, only E-cadherin and Fab were resolved and the catenins were never  
96 visible in the micrographs, indicating that they may have dissociated during freezing. No

97 observable structural differences were noted between samples prepared with cadherin-  
98 only nanodiscs and cadherin-catenin nanodiscs (not shown), but because the catenins  
99 were likely dissociated, no conclusions about their effects, or lack thereof, can be  
100 drawn.

101 Calculation of 2D class averages of wild-type E-cadherin revealed that the  
102 nanodiscs were averaged out, presumably due to a flexible region between the  
103 extracellular and transmembrane domains. We confirmed the presence of nanodiscs  
104 with size exclusion chromatography (SEC) and negative stain EM (Extended Data  
105 Figure 1); nanodiscs alone were also visible in cryo-EM 2D averages (not shown).  
106 Extracellular domains were noticeably rigid, producing distinct class averages (Figure  
107 1C-E). We also note that there appeared to be only one cadherin per disc; we did not  
108 observe any *cis* interactions between cadherins that appeared to emerge from the same  
109 patch of lipids.

110 2D class averages revealed a range of dimer conformations formed from the rigid  
111 cadherin monomers, including, as expected, structures similar to the strand-swap  
112 dimers observed in X-ray crystals, but also what appear to be X-dimers (Figure 1C). As  
113 X-dimers have previously only been observed in crystal structures of mutated EC1-2  
114 fragments, we created a model of the full-length X-dimer by aligning the EC1-2 X-dimer  
115 crystal structure (PDB 4ZT1) to mouse E-cadherin EC1-5 monomers obtained from the  
116 crystal structure (PDB 3Q2V). This creates a structure much like we see in our 2D  
117 averages, a compacted dimer with a diameter of  $\sim 290$  Å, compared to  $\sim 370$  Å for the  
118 more extended strand-swap dimer (Figure 1B). Although proportions varied somewhat  
119 between grid conditions, we saw what appeared to be a similar number of particles in

120 both strand-swap and X-dimer conformations (Figure 1C) in repeated datasets. We  
121 repeated each mutant in the same conditions 2 times; Figure 1 indicates results from  
122 one dataset.

123 To verify that the extended and more compact structures are indeed strand-swap  
124 and X-dimers, respectively, we introduced mutations into E-cadherin that are known to  
125 interfere with dimer formation. Strand-swap dimers are disrupted by the W2A mutation,  
126 which eliminates the strand-swap binding<sup>31</sup>. X-dimers are blocked through the K14E  
127 mutation, which inverts the charge of a salt bridge in the dimer interface<sup>31</sup>. We observed  
128 that W2A E-cadherin 2D averages only exhibit monomer and compact X-dimer  
129 conformations (Figure 1D), whereas K14E E-cadherin only forms extended dimers and  
130 monomers (Figure 1E). Thus, these mutants support our hypothesis that the compacted  
131 dimer is an X-dimer and the extended dimer is a strand-swap dimer.

132 The presence of the X-dimer in these samples was unexpected because the X-dimer  
133 is thought to be a low affinity short-lived transition state. One possibility is that we may  
134 be observing combined strand-swapped X-dimers, which have been postulated to occur  
135 using molecular dynamics simulations of E-cadherin<sup>39</sup> and have been observed in P-  
136 cadherin mutants<sup>33</sup>. This conformation may be more stable than unswapped X-dimers.  
137 However, when we introduce mutations in the Trp2 residue preventing strand-swapping,  
138 a high proportion of compact X-dimers are still visible. Therefore, the observed X-  
139 dimers must include a substantial fraction of non-strand-swapped X-dimers.

140 In addition to the two *trans* dimers known from crystallography data, we also  
141 observed a novel dimer that appears to be mediated by an interaction between the EC4  
142 domains of two opposing cadherins. This dimer was seen in a much smaller but

143 significant percentage of particles over a variety of grid and sample conditions. To  
144 confirm the location of the interaction site, we used EC5 binding Fab 67G8 as a marker  
145 to determine the E-cadherin orientation in the 2D averages (Figure 1F). The Fab's  
146 location close to the dimer interface indicates that this is indeed an EC4-EC4  
147 association. This suggests the possibility that EC4 dimerization may have a role in  
148 cadherin function, but it is difficult to discern its impact from this structural information  
149 alone.

### 150 **Effects of functional antibody binding on monomeric E-cadherin**

151 Previous work demonstrated the dramatic effects of functional antibodies to hE-  
152 cadherin on cell adhesion, particularly activating antibodies on cells<sup>17-19</sup>, as well as in  
153 animal models<sup>19,20</sup>. However, little is understood about the biochemical or structural  
154 mechanism of these activating antibodies. Based on our cryo-EM observations of E-  
155 cadherin structures, we sought to determine how the binding of activating antibodies  
156 affects the conformational landscape of E-cadherin monomers and dimers.

157 By mixing E-cadherin nanodiscs with Fabs, we were able to reliably determine  
158 cryo-EM 3D reconstructions for several functional Fabs bound to E-cadherin. We  
159 compare structures of two activating antibodies (59D2 and 19A11), a control neutral  
160 antibody that has no effect on adhesion (46H7), and an adhesion blocking antibody  
161 (67G8) (Figure 2)<sup>17</sup>. The resolution of each of these ranged from 4.7-6.2 Å, providing  
162 unambiguous docking for each Fab with the cadherin. As noted in previous epitope  
163 mapping work<sup>17</sup>, the two activating antibodies bind near the same site, on the opposite  
164 side of EC1 from the adhesive Trp2 strand (Figure 2A,B,D). The control neutral antibody

165 46H7 binds the outer curve of EC3 (Figure 2A, C). Blocking antibody 67G8 binds the  
166 end of EC5 (Figure 2A, E).

167         Although the activating antibodies have been reported to have allosteric effects  
168 on adhesion, none of them induce any notable large-scale conformational changes in E-  
169 cadherin monomers (Figure 2A); nor did combinations of multiple antibodies (not  
170 shown). Compared to the crystal structure of dimeric mouse E-cadherin (PDB 3Q2V)  
171 there is a subtle curvature difference, particularly in the more kinked Ca<sup>2+</sup> binding site  
172 between EC3-4 (not shown), but this curvature difference was observed for all the  
173 antibodies, including the neutral control. This small difference is unlikely due to Fab  
174 binding and may instead be due to reduced forces on the protein outside of crystal  
175 packing and in its monomeric form. We also note that cryoSPARC 3D variability  
176 analysis of all structures suggests some potential flexibility between EC3-4.

177         The 5-6 Å resolution of all these structures limits our ability to detect more atomic  
178 level effects of antibody binding to monomeric E-cadherin that might be important for  
179 the mechanisms of their effects on adhesion. Nonetheless, in the structures with bound  
180 activating Fabs, there is a notable lack of density in the middle of EC1, and a  
181 corresponding increase in density extending out from where the N-terminal Trp2 strand  
182 would extend (Extended Data Figure 2). This change in densities is not evident in the  
183 structure with neutral antibody 46H7 bound. This change in density with activating Fab  
184 may be significant because the model in the literature for the monomeric state of E-  
185 cadherin has the Trp2 forming an intramolecular bond, filling the hydrophobic pocket in  
186 its own subunit, and the extrusion of the Trp2 leads to the intermolecular strand-swap  
187 dimer that underlies adhesive bond formation. Although not high resolution, our



188 observation raises the possibility that activating Fabs act to destabilize the monomeric  
189 state of E-cadherin. Increasing conformational strain in the N-terminal strand in the  
190 monomer through the E11D mutation was shown to increase dimer affinity in previous  
191 studies<sup>40</sup>, and activating Fabs could be doing something similar.

192

### 193 **Activating Fabs are compatible with strand-swap dimers but not X-dimers**

194 When activating Fabs are bound to E-cadherin, a significant number of strand-  
195 swap dimer particles are observed in the 2D averages in the cryo-EM datasets, but we  
196 never observed X-dimers. In the case of 19A11 bound to WT E-cadherin both strand-  
197 swap dimers and monomeric E-cadherin were present, but not X-dimers (Figure 3A).  
198 The dimers are strand-swapped dimers because 19A11 bound to the E-cadherin W2A  
199 mutant protein revealed only monomeric cadherin (Figure 3B). We also did not observe  
200 X-dimers in any E-cadherin/59D2 Fab datasets (not shown). Overall, it is very clear that  
201 activating Fabs can form complexes with strand-swapped dimers, but not with X-dimers.

202 X-ray crystallographic data also demonstrate an incompatibility between the X-  
203 dimer state and activating Fab binding to E-cadherin. We obtained X-ray structures of  
204 two activating Fabs bound E-cadherin. Activating Fab 66E8 was crystallized with the  
205 hEC1-2 fragment (Figure 3D, Extended Data Figure 4), and 19A11 Fab was crystallized  
206 with either hEC1-2 (Figure 3C, Extended Data Figure 3) or the full hEC1-5 ectodomain  
207 (Figure 4). All Fab-bound E-cadherins crystallized into strand-swapped dimer structures.  
208 These crystallographic data also demonstrate an incompatibility between the X-dimer  
209 state and activating antibody binding to E-cadherin. Both crystal structures of 19A11  
210 bound to E-cadherin (EC1-2 and EC1-5) show that Fab binding involves a salt bridge

211 between the heavy chain of 19A11 and K14 on E-cadherin (Figure 3C). As the K14-  
212 D138 E-cadherin dimer salt bridge is necessary for X-dimer formation, and the affinity of  
213 19A11 to E-cadherin at ~6.5 nM (Extended Data Figure 5A,F) is on the order of  $10^4$   
214 times stronger than the affinity of any dimer of WT E-cadherin ( $\sim 100 \mu\text{M}^{31}$ ), it is unlikely  
215 that the X-dimer would supersede 19A11 binding. The crystal structure of 66E8 Fab,  
216 another activating antibody, bound to hEC1-2 (Extended Data Figure 4), suggests that  
217 the bound Fab would cause a complete steric clash with X-dimer formation (Figure 3D).  
218 Although the affinity of 66E8 is weaker than 19A11 at ~100 nM (Extended Data Figure  
219 5E,F), it still surpasses that of cadherin dimers. Thus, it appears that two different  
220 activating antibodies structurally interfere with the X-dimer.

221 All these data showing incompatibility of activating Fab binding with X-dimer  
222 formation is difficult to reconcile with the proposed role of the X-dimer as a required  
223 transition state intermediate towards formation of strand-swap adhesive dimers.  
224 Mutations that interfere with the formation of the X-dimer prevent cadherin adhesion in  
225 cell models<sup>19,31</sup>. One possibility is that activating antibodies could potentially allow  
226 skipping of the intermediate state. However, Petrova et al.<sup>19</sup> found that 19A11 activating  
227 antibodies did not rescue adhesion by K14E - E-cadherin mutants in cell adhesion  
228 assays. We repeated the experiment with multiple activating antibodies, including 66E8  
229 and 59D2 (Extended Data Figure 8A), and found that none of them were able to rescue  
230 the X-dimer blocking mutation in cell adhesion. Thus, either the X-dimer intermediate is  
231 still required, or the K14 residue has other roles in adhesion.

232 In cryo-EM, we did not observe an increase in the fraction of strand-swapped  
233 dimers in the presence of activating Fabs. For all antibodies, including the control

234 neutral Fab, a small decrease in the proportion of dimers was observed, and we  
235 suspect that changes in protein concentrations in ice rather than any effects of the Fabs  
236 may have been responsible.

237         Although we did not observe an increase in strand-swapped dimers in nanodisc  
238 cadherin preparations by cryo-EM, we also examined whether activating antibody  
239 19A11 exhibited any biochemical effects on the formation of strand-swap dimers of  
240 soluble non-membrane associated cadherins. When Fabs were incubated in excess  
241 with soluble full E-cadherin ectodomains (hEC1-5) and analyzed by size exclusion  
242 chromatography (SEC) 19A11 Fabs increased E-cadherin dimerization (Figure 3G). All  
243 other antibodies appeared to form complexes only with monomeric hEC1-5 at readily  
244 workable concentrations (Extended Data Figure 6). Dimers are represented by an early  
245 peak in the SEC trace at ~13.5 mL. 19A11 Fab bound to the hEC1-5 W2A strand-swap  
246 incapable mutant, but the early peak was no longer evident (Figure 3G), demonstrating  
247 that the early peak in the WT trace was a strand-swap dimer. The X-dimer blocking  
248 K14E – E-cadherin mutant protein alone also eluted with a separated strand-swap  
249 dimer and monomer peak pattern (Figure 3H), consistent with previous studies showing  
250 that it can still form strand-swap dimers at equilibrium<sup>31</sup>. Although K14 is part of the  
251 epitope, 19A11 was also shown by SEC to be able to bind the K14E mutant (Extended  
252 Data Figure 6F), although likely more weakly, but it did not affect monomer/dimer  
253 proportions (Figure 3H). These data suggest that 19A11 induces the formation of  
254 strand-swap dimers in solution, similar to the effects of the K14E X-dimer blocking  
255 mutation.

256

257 **Activating antibodies induce changes in the structure of the strand-swap dimer**

258 Examination of the strand-swapped dimer structures in crystal structures of  
259 activating Fab bound E-cadherin and comparisons with observations of Fab-bound  
260 dimers seen in cryo-EM revealed two very different strand-swap dimer conformations  
261 across the same dimer interface (Figure 4). Most notably, 19A11 Fab bound to EC1-5  
262 (PDB 7STZ) (Figure 4A) crystallized in a different conformation than that of either E-  
263 cadherin alone (PDB 2O72) or of 19A11 Fab bound to EC1-2 (PDB 6CXY) (Figure 4B-  
264 D). From a quaternary structure standpoint, crystal structures of Type I classical  
265 cadherins form a W shape when observed from the side and appear linear when  
266 observed from the top. The structure of hEC1-2/19A11 (PDB 6CXY) formed an  
267 analogous conformation to the linear conformation of the mouse E-cadherin dimer (PDB  
268 3Q2V) (Figure 4C,D). However, 19A11 in complex with the full E-cadherin ectodomain,  
269 hEC1-5/19A11, forms a twisted conformation when viewed from the top, resembling an  
270 “S” – henceforth referred to as the S-dimer (Figure 4A, B). The diameter of this S  
271 conformation is ~360 Å, compared to the linear strand-swap diameter of 370 Å,  
272 revealing a slightly compacted structure.

273 Notably, in one cryo-EM dataset of 19A11 Fab bound to E-cadherin, we noticed  
274 2D class averages for both dimeric conformations (linear and S), as shown by the dimer  
275 shape and degree of Fab protrusion (Figure 4E). Additionally, when examining another  
276 activating Fab, 59D2, we observed both conformations in two separate datasets of  
277 59D2/hE-cadherin and 59D2/full-cadherin catenin complexes (Figure 4F,G). (66E8  
278 activating Fab tended to self-associate, so we were unable to assess dimeric states of  
279 E-cadherin bound to this antibody with EM). Both conformations can be seen when the

280 same activating Fab is bound. Importantly, the “S” conformation was only observed  
281 when activating Fabs were bound to E-cadherin, not with the neutral or blocking Fabs.  
282 The fact this conformation was seen in solution with two different activating antibodies in  
283 addition to the 19A11Fab-EC1-5 crystal structure lends credence to it being biologically  
284 relevant and not a crystal packing artifact.

285 Examination of the molecular details of the dimer interaction in the S  
286 conformation indicate that there is a difference in the angle between EC1 domains at  
287 the strand-swap interface compared to other hE-cadherin crystal structures (Figure 4C,  
288 D). There is also a bend between EC1 and EC2 at the calcium binding site that is most  
289 prominent when compared to mouse EC1-5. This increases the twist in the dimer in the  
290 overall structure in addition to the angle shift between EC1s. Interestingly, the degree of  
291 this bend appears to correlate with EC1 dimer angle, indicating the two changes may be  
292 linked.

293 The only significant conformational change in EC1 between the linear strand-  
294 swap and S-dimer is a symmetric inward shift of the first four N-terminal residues  
295 (DWVI) of both monomers, with the shift most notable in the Trp2 residue (Figure 5). In  
296 fact, although hEC1-5/19A11 shows by far the most pronounced inward shift in known  
297 E-cadherin strand-swap structures, the crystal structure hEC1-2 bound to another  
298 activating Fab, 66E8, also exhibits this inward N-terminal shift (Figure 5C), as well as  
299 the aforementioned bend at the Ca<sup>2+</sup> site (Figure 4F). This Trp2 shift appears to be in  
300 the same plane, with no rotation (Figure 5A,D). Interestingly, there appear to be no  
301 modifications of the hydrophobic pocket in which the Trp2 binds with this linear shift; the

302 opposing protomer Trp2 fits into an identical position in the first protomer pocket  
303 regardless of Trp2 shift (Figure 5D).

304

## 305 **Discussion**

306 This work describes the regulation of the E-cadherin adhesive bond as a  
307 multistate process, involving a variety of conformations, and provides potential  
308 mechanisms for how the bond is regulated by activating antibodies. Previous research  
309 has provided evidence for two cadherin trans-dimer states using X-ray crystallography  
310 and by altering the cadherin with mutations<sup>31,33,35,40</sup> or blocking antibodies<sup>41</sup>. Using cryo-  
311 EM to examine cadherins in solution, we are able to discern both of these dimer  
312 conformations in wild-type E-cadherins, as well previously unreported dimer  
313 conformations, including an EC4-mediated dimer, and an “S” shaped adhesive strand-  
314 swap dimer that was observed only when bound to activating antibodies.

315 This is the first visual evidence of X-dimers forming with WT cadherins, with a  
316 mixture of X- and strand-swap dimers occurring together, which is surprising because  
317 the X-dimer is thought to represent a low affinity and very transient intermediate. This  
318 indicates that X-dimers are much more stable than previously recognized at relatively  
319 low concentrations in solution. All previous measurements indicating a very low affinity  
320 of X-dimer formation have been done using strand-swap incompetent W2A mutants.  
321 When the affinity of WT E-cadherin dimers is measured, there is no way of knowing  
322 which dimer conformation is being analyzed without structural information. It is possible  
323 that some amount of the X-dimers we observe in cryo-EM represent a “strand-swapped  
324 X-dimer” that has been proposed to be a secondary intermediate between X- and

325 strand-swap dimers<sup>33</sup>, in which the cadherins are in the X-dimer conformation, and the  
326 Trp2s are strand-swapped simultaneously. However, the large number of X-dimers that  
327 we observed with E-cadherin harboring the W2A mutation cannot be strand-swapped,  
328 and therefore must represent a larger proportion than expected of unswapped X-dimers.  
329 Although we cannot determine actual affinities from our cryo-EM experiments, these  
330 findings show that the X-dimer exists as a somewhat stable conformation in solution  
331 which does not necessarily advance to forming the strand-swap dimer conformation.  
332 This raises the possibility that both strand-swapped and X-dimers can exist in  
333 equilibrium on the cell surface at the adhesive interface.

334         It is challenging to reconcile our findings from both cryo-EM and Xray  
335 crystallography that activating Fab binding to E-cadherin is structurally incompatible with  
336 X-dimer formation with earlier findings that the X-dimer is a requisite intermediate. It  
337 may be necessary to revisit this model for the pathway of adhesive bond formation.  
338 However, one possibility is that activating Fabs act by preventing the reverse reaction  
339 from strand-swap to X-dimer after the strand-swap adhesive dimer has already formed,  
340 preventing adhesive bond dissociation. This is the most likely explanation for the 66E8  
341 activating antibody which has a large steric clash with X-dimer, and would be consistent  
342 with the model of adherens junction dissociation via the X-dimer proposed by Hong et  
343 al<sup>42</sup>. Another intriguing possibility suggested by the nature of 19A11 Fab-cadherin  
344 structure is that Fab binding enhances the transition from X-dimer to strand-swap dimer.  
345 19A11 Fab forms its own salt bridge with K14, a residue vital to formation of the putative  
346 X-dimer intermediate. At first, this idea appears to be counterintuitive because  
347 mutations blocking the X-dimer block E-cadherin adhesion in cells. However, 19A11

348 Fab is still capable of binding the K14E mutant of E-cadherin as observed in SEC  
349 (Figure 3H, S7F), indicating that this residue is not necessary for binding even though it  
350 is part of the full epitope. Therefore, 19A11 could bind initially when the K14 residue is  
351 participating in the X-dimer dimer interface and then “steal” the salt bridge, forcing it  
352 from the X-dimer into the strand-swap conformation. Our observation of X-dimers co-  
353 existing with strand-swap dimer in solution raises the possibility that a dynamic  
354 equilibrium with both states exists at cell-cell adhesion sites. Then activating antibodies  
355 could drive the dimer into the strand-swapped conformation, resulting in a strengthened  
356 state of adhesion since the strand-swap may be the more favored state under tension<sup>43</sup>.

357 The new twisted “S” dimer conformation that we observe in both cryo-EM and X-  
358 ray crystallography may also represent a further strengthened strand-swapped state,  
359 since it was observed only in the presence of activating antibodies. This conformation  
360 arises mainly from a shift in the first 4 N-terminal residues (DWVI) of the beta strand  
361 important in the monomer to dimer conversion. Vendome et al.<sup>40</sup> emphasized the  
362 importance of beta strand instability leading toward E-cadherin strand-swap  
363 dimerization. The rigidity imposed by the calcium binding sites, primarily mediated by  
364 Glu11, which exists at the hinge point of the beta strand, contribute to “conformational  
365 strain” of the beta strand, promoting its expulsion during strand-swap binding. All 3  
366 activating antibodies studied bind at or near the anchor points on the opposite side of  
367 the cadherin from the beta strand. 19A11 Fab binds the back side of EC1 including  
368 residues close to the Glu11 hinge point; 66E8 and 59D2 bind in the calcium binding  
369 region, all consistent with this model.



370 Finally, in addition to X-, linear strand-swap, and S-strand-swap dimers, other E-  
371 cadherin dimers may exist that are important for regulation of adhesion. We observe of  
372 a reproducible EC4-mediated dimer in cryo-EM (Figure 1C-F), although it is unknown  
373 whether this dimer is biologically relevant. The blocking antibody 67G8 bound to E-  
374 cadherin showed a high proportion of EC4 dimers (Figure 1F) suggesting that it could  
375 have some association with inhibiting adhesion. Furthermore, there are many  
376 indications in the literature that this region is important for controlling cell adhesion.  
377 Several activation distinguishing antibodies bind at the EC3-4 boundary<sup>17</sup>. Also, many  
378 gastric cancer mutations are in the EC4-5 region of E-cadherin<sup>11,19</sup>, and aberrant N-  
379 linked glycosylation of Asn554 (Asn 400 – mature protein) in EC4 has been linked to  
380 poorer gastric cancer outcomes and weakened adhesion<sup>44</sup>. Similarly, the *half-baked*  
381 mutation in the EC4 domain of E-cadherin disrupts morphogenesis of early zebrafish  
382 embryos<sup>45</sup>. Moreover, biophysical studies have found cadherins to undergo a distance  
383 dependent three-step unbinding process under force involving the EC3-4 domains as  
384 well as EC1-2<sup>46</sup>. This evidence for a functional role for EC4 suggests that the EC4 dimer  
385 could have a role in cadherin regulation and should be explored in future studies.

386 This study highlights the complexity of the landscape of E-cadherin *trans*-dimer  
387 states and the roles they play in adhesion regulation by activating antibodies. The effect  
388 of activating Fabs on the X-dimer raises the possibility that the canonical pathway from  
389 monomer to X-dimer to strand-swap dimer needs modification. Alternatively, the  
390 antibodies could act by binding to and dissociate existing X-dimers to induce adhesion  
391 or by preventing adhesive bond dissociation by preventing reversion to the X-dimer. In  
392 addition, more subtle and complex structural changes in the conformation of the strand-

393 swap adhesive bond associated with activating Fab binding may modulate the intricate  
394 dynamic regulation of E-cadherin adhesive binding states.

395

## 396 **Materials and Methods**

397

### 398 **Protein Expression and Purification**

399 *Full-length E-cadherin*. Expression and purification were done following the protocol  
400 from our previous work reconstituting the cadherin-catenin complex<sup>38</sup>. We used the full  
401 sequence of human E-cadherin with the signal sequence and pro-domain deleted ( $\Delta$ 1-  
402 154), an alternative CD33 signal sequence inserted (GMPLLLLLLPLLWAGALA) before  
403 the N-terminal residue, and a Twin-Strep tag added after the C-terminal residue  
404 (SAWSHPQFEKGGGSGGGSGGGAWSHHPQFEK\*). This was cloned into pcDNA3.4  
405 and transfected into Expi293 cells (ThermoFisher) with the ExpiFectamine 293  
406 Expression Kit (ThermoFisher) according to standard protocols. Four days post-  
407 transfection, cells were spun down, and pellets were stored at -80°C until purification.  
408 The base buffer used for all purification steps is Strep Binding Buffer (BB): 50 mM Tris,  
409 150 mM NaCl, pH 8.0. Upon purification, cell pellets were thawed on ice, then  
410 resuspended with 2x pellet volume of lysis buffer: BB + 1mM CaCl<sub>2</sub> + 1% IGEPAL® CA-  
411 630 (Sigma 56741) + 10  $\mu$ L HALT protease inhibitor cocktail (ThermoFisher 78425)/mL  
412 total volume + 18.1 mL BioLock (IBA 2-0205-050)/mL pellet volume. Resuspended  
413 pellets were lysed gently rocking at 4°C for 45 minutes, then insoluble material was  
414 removed by spinning 25000xg for 15 min. Cleared supernatant was loaded into a  
415 StrepTactin XT gravity column (IBA) equilibrated in BB + 1mM CaCl<sub>2</sub> + 1% IGEPAL®

416 CA-630, then washed with BB + 1mM CaCl<sub>2</sub> + 1% IGEPAL® CA-630, then BB + 0.02%  
417 lauryl maltose neopentyl glycol (LMNG) (Anatrace). Protein was eluted in BB + 1mM  
418 CaCl<sub>2</sub> + 0.02% LMNG + 50 mM D-Biotin (IBA), then buffer exchanged into BB + 1mM  
419 CaCl<sub>2</sub> + 0.02% LMNG with a PD-10 column and either flash frozen and stored at -80°C  
420 or immediately used. Protein quality was then assessed by SDS-PAGE and SEC using  
421 a Superose 6 10/300 GL (GE) column.

422 *E-cadherin extracellular domains*. We used residues 155-698 to encompass EC1-5 of  
423 the human E-cadherin extracellular domain. Similarly to full-length E-cadherin, the  
424 signal sequence and pro-domain were deleted ( $\Delta$ 1-154), an alternative CD33 signal  
425 sequence was added, and a Twin-Strep tag added after the C-terminal residue. E-  
426 cadherin used for BLI had an additional 8His tag (HHHHHHHH) after the TwinStrep tag.  
427 These constructs were cloned into pcDNA3.4 and transfected into Expi293 cells  
428 (ThermoFisher) with the ExpiFectamine 293 Expression Kit (ThermoFisher) according  
429 to standard protocols. If protein was to be used for crystallization, 5  $\mu$ M kifunensine was  
430 added at time of transfection to limit glycosylation processing. As this protein was  
431 secreted into the medium, cells were spun down 4 days post-transfection, and  
432 supernatant was retained and 0.2  $\mu$ M filtered. If protein was for crystallization, 500000 U  
433 Endo Hf (NEB) was added to the filtered supernatant and incubated for 1-2 days before  
434 purification to remove branched glycans. Cell culture supernatant was treated with  
435 18.1 $\mu$ L/mL BioLock (IBA), 10x BB to 1x, and CaCl<sub>2</sub> to 1 mM for 15 min to block biotin  
436 from binding the StrepTactin column and create favorable buffer conditions for column  
437 binding. Supernatant was then loaded into a StrepTactin XT gravity column (IBA)  
438 equilibrated in BB + 3mM CaCl<sub>2</sub>, then washed with BB+ 3mM CaCl<sub>2</sub>. Protein was eluted

439 in BB + 3mM CaCl<sub>2</sub> + 50 mM D-Biotin (IBA), then buffer exchanged back into BB + 3mM  
440 CaCl<sub>2</sub> with a PD-10 column and flash frozen and stored at -80°C. Protein quality was  
441 assessed by SDS-PAGE and SEC using a Superose 6 10/300 GL (GE) column.

#### 442 *hE-cadherin EC1-2*

443 We used residues 155-371 to encompass EC1-2 of the human E-cadherin extracellular  
444 domains. Similarly, to full-length E-cadherin, the signal sequence and pro-domain were  
445 deleted ( $\Delta$ 1-154). EC1-2 was expressed as a fusion protein by attaching 6x His tagged  
446 SMT3 to the N-terminus (PMID: 18467498). The EC1-2 construct was cloned into  
447 pET21a plasmid system and transformed into BL21 (DE3) competent cells (Novagen).  
448 Cultures were grown in autoinduction media (PMID: 15915565) overnight and harvested  
449 via centrifugation. Thawed bacterial pellets were lysed by sonication in 200 ml buffer  
450 containing 25 mM HEPES pH 7.0, 500 mM NaCl, 5% Glycerol , 0.5% CHAPS, 10mM  
451 Imidazole, 10 mM MgCl<sub>2</sub>, and 3 mM CaCl<sub>2</sub>. After sonication, the crude lysate is  
452 clarified with 2 $\mu$ l (250 units/ $\mu$ l) of Benzonase and incubated while mixing at room  
453 temperature for 45 minutes. The lysate is then clarified by centrifugation at 10,000 rev  
454 min<sup>-1</sup> for 1 h using a Sorvall centrifuge (Thermo Scientific) followed by filtration via  
455 0.45 $\mu$ m syringe filters. The clarified supernatant was then passed over a Ni-NTA His-  
456 Trap FF 5 ml column (GE Healthcare) which was pre-equilibrated with loading buffer  
457 composed of 25 mM HEPES pH 7.0, 500 mM NaCl, 5% Glycerol, 20 mM Imidazole, and  
458 3 mM CaCl<sub>2</sub>. The column is washed with 20 column volumes (CV) of loading buffer  
459 and was eluted with loading buffer plus 500 mM imidazole in a linear gradient over 10  
460 CV. Peak fractions, as determined by UV at 280 nm, are pooled and concentrated to  
461 10mL. Pooled fractions are dialyzed overnight against 4 liters buffer containing 500mM

462 NaCl, 25mM HEPES, 5% Glycerol, 3mM CaCl<sub>2</sub> (SEC Buffer) with His-tagged Ulp1  
463 protease added to cleave the 6xHis-SMT3 fusion protein at a ratio of 1 mg Ulp1 for  
464 1000 mg protein. Dialysate is passed over a Ni-NTA His-Trap FF 5 ml column to  
465 remove 6xHis-SMT3 fusion protein and Ulp1. Flowthrough from the nickel column is  
466 concentrated to 5 ml and passed over a Superdex 75 SEC column (GE) equilibrated  
467 with SEC Buffer. The peak fractions were collected and analyzed for the presence of  
468 the protein of interest using SDS-PAGE. The peak fractions were pooled and  
469 concentrated using Macrosep 20 mL 10K MWCO protein concentrators (Pall). Aliquots  
470 were flash-frozen in liquid nitrogen and stored at -80°C until use for crystallization or in  
471 preparation of hE-cadherin EC1-2-Activating Fab complexes.

#### 472 *Fabs*

473 Sequences coding for the heavy chain of Fab fragments were cloned into pcDNA3.4  
474 with either a C-terminal 6His-tag or Twin-Strep tag sequences described above.  
475 ExpiCHO cells (ThermoFisher) were transfected with the appropriate light chain and  
476 heavy chain encoding plasmids for each Fab following the ExpiFectamine CHO  
477 Transfection Kit (ThermoFisher) high titer protocol. Purification of 6His-tag Fabs was  
478 carried out as follows: two weeks post-transfection, antibodies were affinity purified from  
479 about 175 mL of ExpiCHO medium (ThermoFisher) cleared by centrifugation and  
480 filtration on a 2 mL CaptureSelect LC-kappa (mur) affinity column (Thermo Scientific).  
481 The Fab was eluted with 0.1M Glycine, pH 3.4, neutralized with Tris pH 8.8 and applied  
482 to a HisPur Ni-NTA resin (Thermo Scientific) column. The Fab was eluted with 250 mM  
483 imidazole and buffer exchanged with PD-10 columns (Cytiva) to 50 mM Tris pH 8.0,  
484 0.15M NaCl and 3mM CaCl<sub>2</sub>. To obtain a single pure species of 19A11 for

485 crystallography, a minor glycosylated product (10% of the total) was removed by  
486 incubating with ConA slurry (GE Healthcare) for 4 hours at 4°C. on a rotator. For  
487 production of a single species of 66E8 for crystallography, 6 µM kifunensine was added  
488 to the ExpiCHO culture media at the time of transfection. For production of a single  
489 species of 66E8 for crystallography, 6 µM kifunensine was added to the ExpiCHO  
490 culture media at the time of transfection and Endo Hf (NEB) treatment of LC-kappa  
491 purified protein (~10,000 U/mg protein at 4°C for 3 hours) was done prior to HisPur Ni-  
492 NTA purification. Isolation of a single species for each Fab was verified by PAGE and  
493 activation of cellular E-cadherin was confirmed by Colo205 activation assay (described  
494 below). Purification of StrepTag Fabs from ExpiCHO culture medium was performed  
495 using StrepTactin XT Superflow High Capacity resin (IBA), elution with 50 mM biotin,  
496 followed by buffer exchange with PD-10 columns to 50 mM Tris pH 8.0, 0.15 M NaCl  
497 and 3 mM CaCl<sub>2</sub>.

#### 498 *E-cadherin EC1-5/19A11 complex formation.*

499 hEC1-5 was incubated with a 1.6x molar excess of conA-purified 19A11-6His Fab and  
500 incubated overnight at 4°C. Complex was purified with SEC with a Superose 6 10/300  
501 GL column and concentrated to 11.5 mg/mL in 50 mM Tris, 150 mM NaCl, 3 mM CaCl<sub>2</sub>,  
502 pH 8.0.

#### 503 **Nanodisc preparation.**

504 Purified full-length E-cadherin was concentrated to 8-10 µM and mixed with the  
505 nanodisc scaffolding protein MSP1D1 (Sigma) at a 5 fold molar excess. Samples later  
506 bound to 46H7 and 19A11 were incubated with catenins, as detailed in a previous  
507 study<sup>38</sup>. 100mM DMPC / 200 mM CHAPS in 20 mM Tris 7.4, 100 mM NaCl was added

508 to a final DMPC/CHAPS concentration of 8 mM /16 mM, respectively. The final ratio for  
509 disc formation was 1 E-cadherin : 5 MSP1D1 : 80 DMPC per disc. This mixture was  
510 incubated for 30 min at 20°C, then 0.8 g/mL Amberlite® XAD®-2 (Sigma-Aldrich 10357)  
511 was added to remove detergent and incubated for a further 2 hours at 20°C. Assembled  
512 E-cadherin-TwinStrep discs were purified away from empty discs with a 1 mL  
513 StrepTactin XT column equilibrated in BB. Column was washed with BB and eluted with  
514 BB + 50 mM Biotin. E-cadherin nanodiscs were further purified with SEC using a  
515 Superose 6 10/300 GL SEC column (GE). Peak fractions containing all components  
516 were collected, and glycerol was added to 2.5%. Protein was then concentrated to 0.2-  
517 0.4 mg/mL, flash frozen, and stored at -80°C.

## 518 **X-ray crystallography**

### 519 *Crystallization*

520 The hEC1-2/66E8 complex was crystallized at 10.4 mg/mL at 14C and mixed 1:1 with a  
521 solution of 12.5% (w/v) PEG 4000, 20% (v/v) 1,2,6-hexanetriol, 0.1M GlyGly/AMPD pH  
522 8.5, and 0.03M of each lithium sulfate, sodium sulfate, and potassium sulfate (Morpheus  
523 II A10). The hEC1-5/19A11 complex was crystallized at 11.5 mg/mL at 14C and mixed  
524 2:1 with a solution of 0.1 M sodium HEPES pH 7.0 and 15% w/v PEG 4000 (ProPlex  
525 B11). Upon harvesting, crystals were cryocooled in liquid nitrogen. hE-cad1-2/66E8  
526 crystals did not require additional cryoprotection. hE-cad EC1-5/19A11 crystals were  
527 dipped in a 15% ethylene glycol solution prior to cryocooling.

### 528 *Data collection and processing*

529 X-ray diffraction data for both complexes were collected at the LS-CAT beamline 21-ID-  
530 F at the Advanced Photon Source. Data were collected at 100K at a wavelength of  
531 0.97872 Å. All data were integrated and scaled using XDS and XSCALE.

#### 532 *Structure solution and refinement*

533 Structures were solved by molecular replacement using Phaser within the CCP4  
534 program suite. Each structure utilized a model for each the cadherin and antibody: PDB  
535 entries 2o72 and 2v17, respectively (hEC1-2/66E8); PDB entries 3q2v and 6cxy,  
536 respectively (hEC1-5/19A11). Structures were refined in iterative cycles of real space  
537 refinement in Coot and reciprocal space refinement in Phenix. The quality of each  
538 model was assessed using MolProbity as implemented in Phenix. Final hEC1-2/66E8  
539 structure was deposited to the PDB as 6VEL. Final hEC1-5/19A11 structure was  
540 deposited as PDB 7STZ. Structure refinement data are provided in Table 4.

#### 541 **Cryo-EM sample preparation and data collection**

542 For full-length hE-Cadherin-catenin nanodiscs (19A11 + 46H7), 10 µL nanodiscs  
543 at 0.2 mg/mL (2 µg) were incubated with 2 µL of 1 mg/mL (2 µg) Fab for 1 hour at 20°C.  
544 After incubation, these were diluted in half, and 3 µL diluted sample was applied to a  
545 glow discharged C-Flat™ Holey Carbon Grid CF-2/2-4C, 400 mesh Cu (Electron  
546 Microscopy Sciences CF-224C-50). This was incubated for 1 min, then blotted using a  
547 Vitrobot Mark IV (FEI) at 4°C, 100% humidity, 4-5 sec blot time, 0 blot force, then  
548 plunge frozen in liquid ethane. Data was collected on a 300 kV Titan Krios G3 with a K2  
549 Summit camera in super-resolution mode (0.525 Å/pix).

550 For full-length hE-Cadherin-only nanodiscs with Fab (59D2 and 67G8), 10 µL  
551 nanodiscs at 0.2 mg/mL (2 µg) were incubated with 2 µL of 1 mg/mL (2 µg) Fab for 1



552 hour at 20°C. After incubation, these were diluted to 1/3, and 3  $\mu$ L diluted sample was  
553 applied to a glow discharged Au-Flat 2/2 200 Gold Mesh grid (AUFT222-50) (59D2) or  
554 C-Flat™ Holey Carbon Grid CF-2/2-4C, 400 mesh Cu (67G8). This was incubated for 1  
555 min, then blotted using a Vitrobot Mark IV (FEI) at 4°C, 100% humidity, 4-5 sec blot  
556 time, 0 blot force, then plunge frozen in liquid ethane. Data was collected on a 300 kV  
557 Titan Krios G3 with a K3 Summit camera. 67G8 data was collected in super-resolution  
558 mode (0.42 Å/pix); 59D2 data was collected in regular counting mode (0.84 Å /pix).

559 For full-length hE-Cadherin-only nanodiscs examined only as 2D averages (WT,  
560 W2A, K14E, WT+19A11, W2A+19A11), 10  $\mu$ L nanodiscs at 0.2 mg/mL (2  $\mu$ g) were  
561 incubated with 2  $\mu$ L of 1 mg/mL (2  $\mu$ g) Fab, if applicable, for 1 hour at 20°C. After  
562 incubation, or in samples with no Fab, immediately, these were diluted in half, and 3  $\mu$ L  
563 diluted sample was applied to a glow discharged C-Flat™ Holey Carbon Grid CF-2/2-  
564 4C, 400 mesh Cu (Electron Microscopy Sciences CF-224C-50). This was incubated for  
565 1 min, then blotted using a Vitrobot Mark IV (FEI) at 4°C, 100% humidity, 4-5 sec blot  
566 time, 0 blot force, then plunge frozen in liquid ethane. Data was collected on a 200 kV  
567 Glacios Cryo-TEM with a K2 Summit camera at 1.16 Å /pix.

568 All datasets were queued and collected using Leginon <sup>47</sup>.

569 We note again that the data here for 19A11 and 46H7 grids were collected with  
570 full cadherin-catenin complex. As the results were the same whether or not catenins  
571 were bound, as detailed in previous work<sup>38</sup>, subsequent analyses (67G8, 59D2, no fab,  
572 mutants) were done on just nanodisc-embedded FL-hE-cadherin-TwinStrep with no  
573 intracellular proteins bound.

574 **Cryo-EM data processing**

575 For FL-hE-cadherin-catenin complex ND + 19A11Fab, data for 1823 movies  
576 were aligned with MotionCor2 in Relion 3.0.3<sup>48</sup> then CTF was estimated with  
577 CryoSPARC v2.14<sup>49</sup>. 205,013 particles were picked with a crYOLO v1.3.6<sup>50</sup> model  
578 trained on this dataset, extracted in Relion 3.0.3, then re-imported back to cryoSPARC  
579 for further processing. 204,452 particles were extracted and immediately subjected to  
580 ab initio reconstruction into 3 volumes. Classes 0 and 1 (145,965 particles) were  
581 selected, and underwent Homogeneous refinement based on the class 0 model in  
582 CryoSPARC. These particles then went through a round of 2D averaging to clean out  
583 junk particles. The final 99,879 selected particles then were homogeneous refined using  
584 the previous refinement reconstruction as a model, then all particles and the model  
585 were used for cryoSPARC non-uniform refinement, leading to a gold standard FSC final  
586 resolution of 4.85 Å after mask auto-tightening. Although all views were represented,  
587 preferred views were more represented in the reconstruction, resulting in a skewed  
588 range of directional views. As done in Billesbølle et al.<sup>51</sup>, particle stacks were then  
589 exported with csparc2star.py as part of the pyem package<sup>52</sup>; stacks were created in  
590 Relion and imported into cisTEM<sup>53</sup>. New half maps were generated with the generate3D  
591 module; maps were sharpened in cisTEM. Local resolution was estimated in  
592 cryoSPARC, and FSCs were calculated with Relion, showing identical resolution  
593 estimates to cryoSPARC's NU-refinement calculated resolution. Although average  
594 resolution was unchanged as measured by Relion, new maps generated in cisTEM  
595 showed a less broad range of local resolution estimates, as well as improved 3D FSC  
596 (0.966 in the cisTEM generated map vs 0.844 for cryoSPARC) as measured by the 3D  
597 FSC server<sup>54</sup>, compared to the raw cryoSPARC NU-refinement reconstructions.

598 For FL-hE-cadherin-catenin complex ND + 46H7Fab, 2004 movies were  
599 imported, motion corrected, and CTF estimated with cryoSPARC 2.14. Poor and low  
600 resolution exposures were removed, resulting in 1962 micrographs. A small number of  
601 particles were manually picked, 2D averaged, and used as templates for particle picking  
602 in cryoSPARC. 531,229 particles were picked and extracted. After 2 rounds of 2D  
603 averaging to remove bad and broken particles, as well as unbound Fabs, the remaining  
604 108,022 particles were inputted to Ab initio reconstruction in cryoSPARC with 4 models.  
605 These 4 models then went through Heterogeneous refinement, also in cryoSPARC.  
606 Two classes (0+1) were picked, resulting in 67,509 final particles that underwent  
607 homogeneous refinement (using class 1 as the model), then non-uniform refinement,  
608 resulting in a final reconstruction at 4.75 Å resolution by gold-standard FSC. As  
609 described previously, new maps were created in cisTEM with the generate3D  
610 command, local resolution was estimated in cryoSPARC, and overall resolution FSCs  
611 were generated with Relion.

612 For FL-hE-cadherin ND + 59D2 Fab, 3805 movies were imported, patch motion  
613 corrected, and patch CTF estimated with cryoSPARC 2.14. Template picker was used  
614 to pick 1,077,980 particles; after exposure curation, 830,126 particles were extracted  
615 and underwent 3 rounds of 2D averaging to remove junk particles, leaving 534,216  
616 particles. 100,000 of these underwent Ab initio reconstruction into 3 classes; all 534,216  
617 particles were then heterogeneously refined to these 3 classes. Classes 0 and 1  
618 (331,400 particles) underwent homogeneous refinement, then non-uniform refinement  
619 with class 0 as the starting model, still in cryoSPARC. These were re-extracted at 640  
620 bin 2 box sizes, then went through one additional round of non-uniform refinement,

621 resulting in a 6.24 Å reconstruction. As described previously, new maps were created in  
622 cisTEM with the generate3D command, local resolution was estimated in cryoSPARC,  
623 and overall resolution FSCs were generated with Relion.

624 For FL-hE-cadherin ND + 67G8 Fab, 1213 movies at 0 degree tilt and 442  
625 movies at 30 degree tilt from 2 data collections were separately patch motion corrected  
626 and CTF estimated with cryoSPARC 2.14. Each then had particles picked in crYOLO (0:  
627 279009; 30: 77977) and went through two rounds of 2D averaging leading to a final  
628 particle count of 192133 particles. The combined particles went through one final round  
629 of 2D averaging, leading to a particle count of 116371 particles. These then went into an  
630 Ab initio reconstruction of 4 classes, followed by heterogeneous refinement of these 4  
631 class models. Classes 0+1+3 (97712 particles) were selected and homogeneous  
632 refined, followed by non-uniform refinement, leading to a final 3D reconstruction at 5.55  
633 Å resolution by gold-standard FSC. As described previously, new maps were created in  
634 cisTEM with the generate3D command, local resolution was estimated in cryoSPARC,  
635 and overall resolution FSCs were generated with Relion.

636 FL-hE-cadherin ND WT, W2A, K14E, WT+19A11, W2A+19A11 all went through  
637 analogous data analysis procedures to ensure comparative results. Each of these  
638 datasets was also repeated a second time with fresh sample to verify repeatability.  
639 Briefly, movies were aligned with Patch Motion correction with CryoSPARC v2.14; CTF  
640 was estimated with CryoSPARC Patch CTF. Particles were then picked using crYOLO,  
641 using a model trained on WT E-cadherin, extracted in Relion, and re-imported back into  
642 cryoSPARC, where they were extracted with 512 bin 4 box sizes and subjected to two  
643 rounds of 2D classification to weed out junk particles. A third round of classification

644 where the initial classification uncertainty factor was set to 6, and 40 iterations of  
645 classification were performed, was used to separate different dimer conformations.

### 646 **Bio-Layer interferometry**

647 BLI kinetics assays were performed on an Octet Red96 at 23°C, shaking at 1000  
648 rpm. Protein was diluted in kinetics buffer: 50 mM Tris pH 8.0, 150 mM NaCl, 3mM  
649 CaCl<sub>2</sub>, 0.25 mg/mL BSA, 0.005% Tween-20. Ni-NTA sensors (ForteBio) were  
650 equilibrated for 60 seconds, then E-cadherin EC1-5-TwinStrep-8His was loaded onto  
651 the sensor for 180 seconds, followed by another 60 second baseline. Sensors were  
652 then immersed into a 1:3 dilution series of anti-E-cadherin Fabs in kinetics buffer until  
653 they reached desired concentrations, then dipped into empty kinetics buffer to  
654 determine off-rates. ForteBio data analysis software was used to calculate kinetics  
655 parameters such as  $k_{on}$ ,  $k_{off}$ , and  $K_D$  using a 1:1 binding global fit model. Assays were  
656 repeated at least twice with different Fab preparations to ensure consistent results. For  
657 19A11 and 46H7, both ficin-cleaved untagged Fabs and TwinStrep tagged Fabs were  
658 tested; both showed similar affinities regardless of presence of tag (Extended Data  
659 Figure 4F).

### 660 **Analytical size exclusion chromatography**

661 hE-cadherin EC1-5 TwinStrep constructs were incubated with 3.2x molar excess Fab  
662 (2x by mass) at 4°C for ~16 hours. Mixtures were then injected into a Superose 6  
663 10/300 column. For analysis, elution times were multiplied by the 0.5 mL/min flow rate  
664 to calculate elution volume in mL. Fractions were run on 5-20% SDS-PAGE gels to  
665 examine protein composition of each peak.

### 666 **Colo205 Activation Assay**

667 The Colo205 activation assay was performed as described previously<sup>17</sup>. Briefly,  
668 Colo205 cells were densely plated on 96-well plates precoated with 0.1 µg/mL rat-tail  
669 collagen (Sigma-Aldrich) overnight and treated with activating concentrations of Fabs  
670 for 5 hours. Activation was determined by the extent of a morphological change from  
671 round cells with distinct borders to a compact epithelial appearance and loss of obvious  
672 cell borders.

### 673 **Funding**

674 This work was supported by National Institutes of Health (NIH) grant R35GM122467 to  
675 BMG. This project has been funded in whole or in part with Federal funds from the  
676 National Institute of Allergy and Infectious Diseases, National Institutes of Health,  
677 Department of Health and Human Services, under Contract No. HHSN272201700059C.  
678 The Glacios electron microscope facility was supported by National Institutes of Health  
679 (NIH) Award S10OD032290.

### 680 **Conflict of Interest Statement**

681 The authors do not declare any competing interests.

### 682 **Data Availability Statement**

683 X-ray crystallographic structures generated during the current study are available in the  
684 Protein Data Bank with accession codes 7STZ (hE-cadherin EC1-5/19A11) and 6VEL  
685 (hE-cadherin EC1-2/66E8). Cryo-EM density maps are available in the Electron  
686 Microscopy Data Bank with accession codes 25883 (hE-cadherin/19A11), 25884 (hE-  
687 cadherin/46H7), 25886 (hE-cadherin/59D2), and 25892 (hE-cadherin/67G8). All other  
688 datasets generated and/or analyzed during the current study are available from the  
689 corresponding author on reasonable request.

690 **Acknowledgements**

691 We thank Justin Kollman and Melody Campbell for valuable discussions and input. We  
692 thank Joel Quispe, Quinton Beedle, and Sasha Dickinson for training and support on  
693 cryo-EM equipment. We thank also David Veessler and Kelly Lee for use and training on  
694 the Octet Red96. Cryo-EM data was analyzed with the Cybertron high-performance  
695 computing cluster at Seattle Children's Research Institute. Cryo-EM was performed at  
696 the University of Washington Arnold and Mabel Beckman cryo-EM center.

697

698

| <b>Antibody</b> | <b>Effect on E-cad</b> | <b>Epitope</b> |
|-----------------|------------------------|----------------|
| 19A11           | Activating             | EC1            |
| 59D2            | Activating             | EC1            |
| 66E8            | Activating             | EC1-2          |
| 46H7            | Neutral                | EC3            |
| 67G8            | Blocking               | EC5            |

699

700

701

702

Table 1. Recombinant functional antibody fragments used in this study



703  
704

| PDB         | Protein                          |
|-------------|----------------------------------|
| <b>3Q2V</b> | Mouse E-cadherin EC1-5           |
| <b>2O72</b> | Human E-cadherin EC1-2           |
| <b>6CXY</b> | Human E-cadherin EC1-2/19A11 Fab |
| <b>7STZ</b> | Human E-cadherin EC1-5/19A11 Fab |
| <b>6VEL</b> | Human E-cadherin EC1-2/66E8 Fab  |

705  
706  
707  
708

Table 2. PDBs created or referenced in this study

709  
710

---

|                                | <b>hEC1-2/66E8</b>            | <b>hEC1-5/19A11</b>               |
|--------------------------------|-------------------------------|-----------------------------------|
| Wavelength                     | 0.9787                        | 0.9787                            |
| Resolution range               | 46.54 - 2.65 (2.745 - 2.65)   | 49.54 – 2.95 (3.055 – 2.95)       |
| Space group                    | P 31 2 1                      | P 1 21 1                          |
| Unit cell                      | 142.17 142.17 90.32 90 90 120 | 85.34 131.62 201.76 90 100.861 90 |
| Total reflections              | 269829 (27242)                | 685577 (50776)                    |
| Unique reflections             | 30878 (3042)                  | 92265 (6783)                      |
| Multiplicity                   | 8.7 (9.0)                     | 7.4 (7.5)                         |
| Completeness (%)               | 99.9 (99.9)                   | 99.9 (100.0)                      |
| Mean I/sigma(I)                | 26.01 (3.86)                  | 14.25 (3.20)                      |
| R-merge                        | 0.0620 (0.562)                | 0.118 (0.631)                     |
| R-meas                         | 0.066 (0.596)                 | 0.127 (0.678)                     |
| CC1/2                          | 0.999 (0.934)                 | 0.997 (0.897)                     |
| Reflections used in refinement | 30872 (3040)                  | 92206 (9197)                      |
| Reflections used for R-free    | 1542 (171)                    | 1996 (200)                        |
| R-work                         | 0.1889 (0.2568)               | 0.1822 (0.2731)                   |
| R-free                         | 0.2380 (0.3134)               | 0.2079 (0.2974)                   |
| CC(work)                       | 0.931 (0.877)                 | 0.937 (0.856)                     |
| CC(free)                       | 0.889 (0.873)                 | 0.950 (0.812)                     |
| Number of non-hydrogen atoms   | 4890                          | 14690                             |
| macromolecules                 | 4729                          | 13868                             |
| ligands                        | 33                            | 288                               |

|                           |       |       |
|---------------------------|-------|-------|
| solvent                   | 128   | 534   |
| Protein residues          | 630   | 1837  |
| RMS(bonds)                | 0.004 | 0.003 |
| RMS(angles)               | 0.68  | 0.55  |
| Ramachandran favored (%)  | 96.94 | 95.80 |
| Ramachandran allowed (%)  | 2.74  | 3.92  |
| Ramachandran outliers (%) | 0.32  | 0.28  |
| Rotamer outliers (%)      | 2.49  | 1.87  |
| Clashscore                | 5.44  | 4.16  |
| Average B-factor          | 72.07 | 79.85 |

---

711  
712  
713  
714

Table 3. X-ray data collection and refinement statistics.

715  
716

| <b>Cryo-EM data collection and processing statistics</b> |                                                       |                                                      |                                      |                                      |
|----------------------------------------------------------|-------------------------------------------------------|------------------------------------------------------|--------------------------------------|--------------------------------------|
| <b>Sample</b>                                            | <b>Full-length E-cadherin-catenin complex + 19A11</b> | <b>Full-length E-cadherin-catenin complex + 46H7</b> | <b>Full-length E-cadherin + 59D2</b> | <b>Full-length E-cadherin + 67G8</b> |
| <b>Data collection</b>                                   |                                                       |                                                      |                                      |                                      |
| Microscope                                               | Titan Krios                                           | Titan Krios                                          | Titan Krios                          | Titan Krios                          |
| Voltage (kV)                                             | 300                                                   | 300                                                  | 300                                  | 300                                  |
| Magnification                                            | 130000x                                               | 130000x                                              | 105000x                              | 105000x                              |
| Detector                                                 | Gatan K2                                              | Gatan K2                                             | Gatan K3                             | Gatan K3                             |
| Data collection software                                 | Leginon                                               | Leginon                                              | Leginon                              | Leginon                              |
| Electron exposure ( $e^-/\text{\AA}^2$ )                 | 40                                                    | 40                                                   | 47                                   | 64                                   |
| Defocus Range ( $\mu\text{m}$ )                          | -1 -- -2.5                                            | -1 -- -2.5                                           | -1 -- -2.5                           | -1 -- -2.5                           |
| Pixel size ( $\text{\AA}$ )                              | 0.525                                                 | 0.525                                                | 0.84                                 | 0.42                                 |
| <b>Data processing</b>                                   |                                                       |                                                      |                                      |                                      |
| Number of micrographs                                    | 1823                                                  | 2004                                                 | 3805                                 | 1655                                 |
| Final particle images                                    | 99879                                                 | 67509                                                | 331400                               | 97712                                |
| Symmetry imposed                                         | C1                                                    | C1                                                   | C1                                   | C1                                   |
| Map resolution ( $\text{\AA}$ ) 0.143 FSC threshold      | 4.85                                                  | 4.75                                                 | 6.24                                 | 5.55                                 |

717  
718  
719

Table 4. Cryo-EM data collection, reconstruction, and refinement.

720  
721

|                     | <b>19A11</b> | <b>46H7</b> | <b>59D2</b> | <b>67G8</b> | <b>66E8</b> |
|---------------------|--------------|-------------|-------------|-------------|-------------|
| K <sub>D</sub> calc | 8.05E-09     | 9.46E-07    | 1.19E-12    | 9.59E-09    | 9.01E-08    |
|                     | 5.10E-09     | 2.58E-07    | 2.42E-12    | 4.56E-09    | 9.65E-08    |
|                     | 6.71E-09     | 3.24E-07    | 1.81E-12    | 1.09E-08    | 9.18E-08    |
|                     | 6.42E-09     |             | 1.88E-12    | 9.52E-09    |             |
| Average             | 6.57E-09     | 5.09E-07    | 1.83E-12    | 8.64E-09    | 9.28E-08    |
| Std dev             | 1.21015E-09  | 3.79602E-07 | 5.0349E-13  | 2.79469E-09 | 3.33593E-09 |

722  
723  
724

Table S1. Individual measurements and kinetics calculations of Fab affinity.

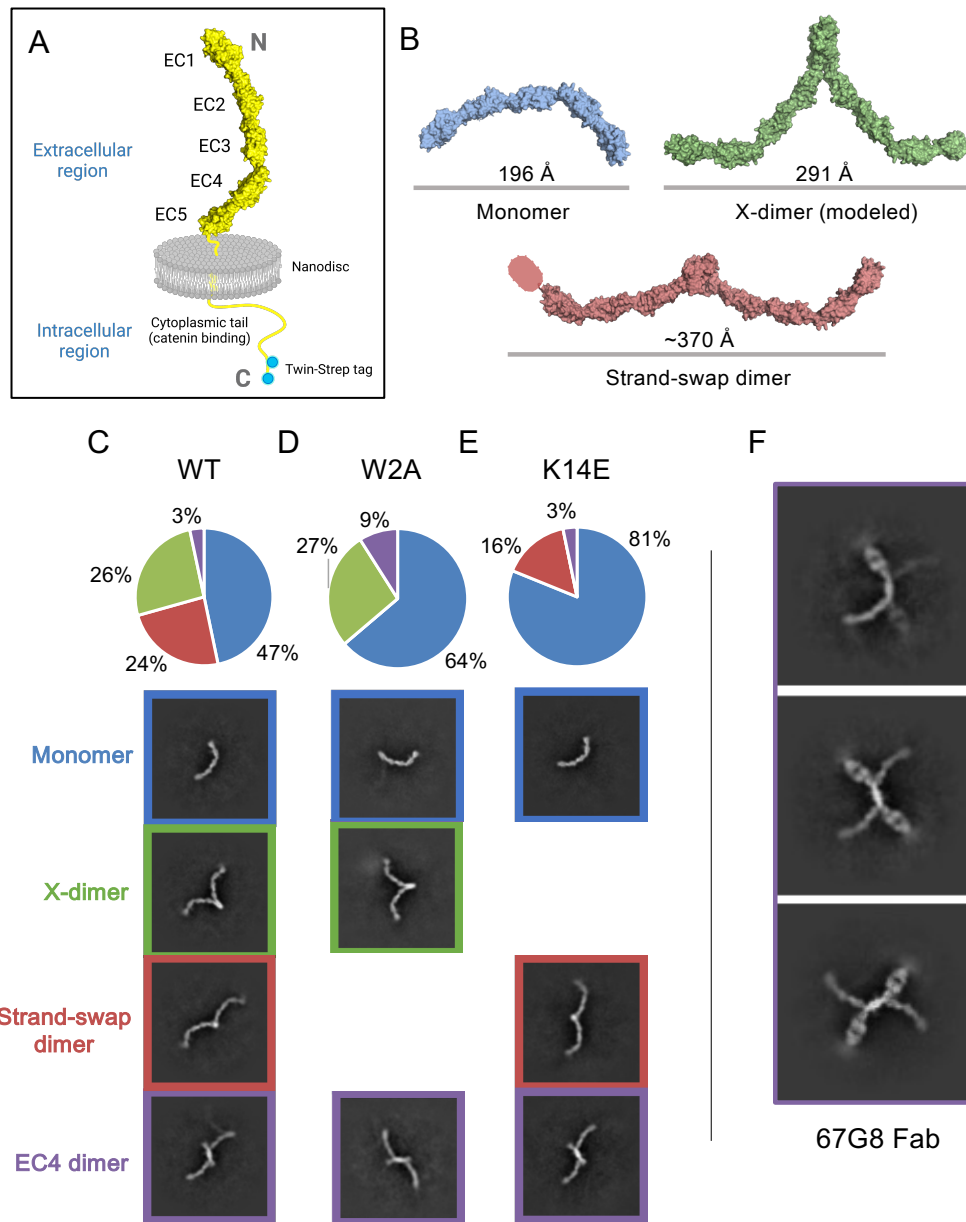

725  
726

727 Figure 1. Cryo-EM 2D class averages of E-cadherin reveal monomers, X-dimers, and  
728 strand-swap dimer, as well as other novel dimer conformations. (A) Schematic of full  
729 protein used in this study. (B) Known and theoretical dimer conformations of E-cadherin.  
730 Monomer and strand-swap dimer: PDB 3Q2V. X-dimer created with alignment: PDB  
731 3LNH, 3Q2V. (C) Class averages of WT full-length hE-cadherin include monomers, X-  
732 dimers, strand-swap dimers, and novel EC4 dimers. (D) Class averages of W2A full-  
733 length hE-cadherin include monomers, X-dimers, and EC4 dimers. (E) Class averages  
734 of K14E full-length hE-cadherin include monomers, strand-swap dimers, and EC4  
735 dimers. (F) 67G8 EC5-binding Fab bound to FL-hE-cadherin indicates that novel dimers  
736 are indeed EC4-mediated.

737

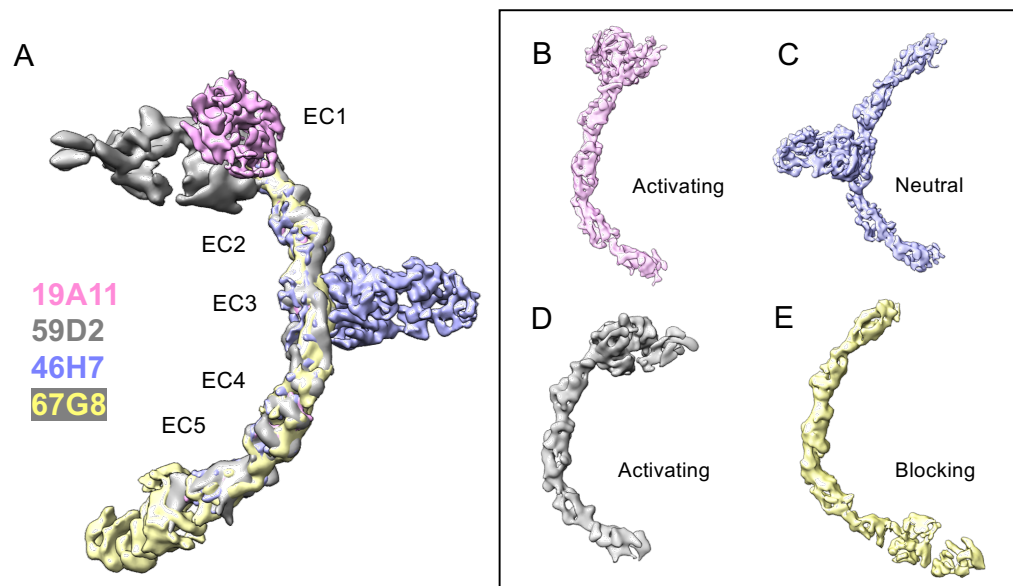

738  
739

740 Figure 2. Cryo-Electron microscopy reconstructions show that monomeric structure of  
741 E-cadherin is not dramatically affected by activating Fab binding. (A) Overlay of all  
742 structures (B) hEC1-5 with activating Fab 19A11 (C) hEC1-5 with neutral Fab 46H7 (D)  
743 hEC1-5 with activating Fab 59D2 (E) hEC1-5 with inhibitory Fab 67G8.

744

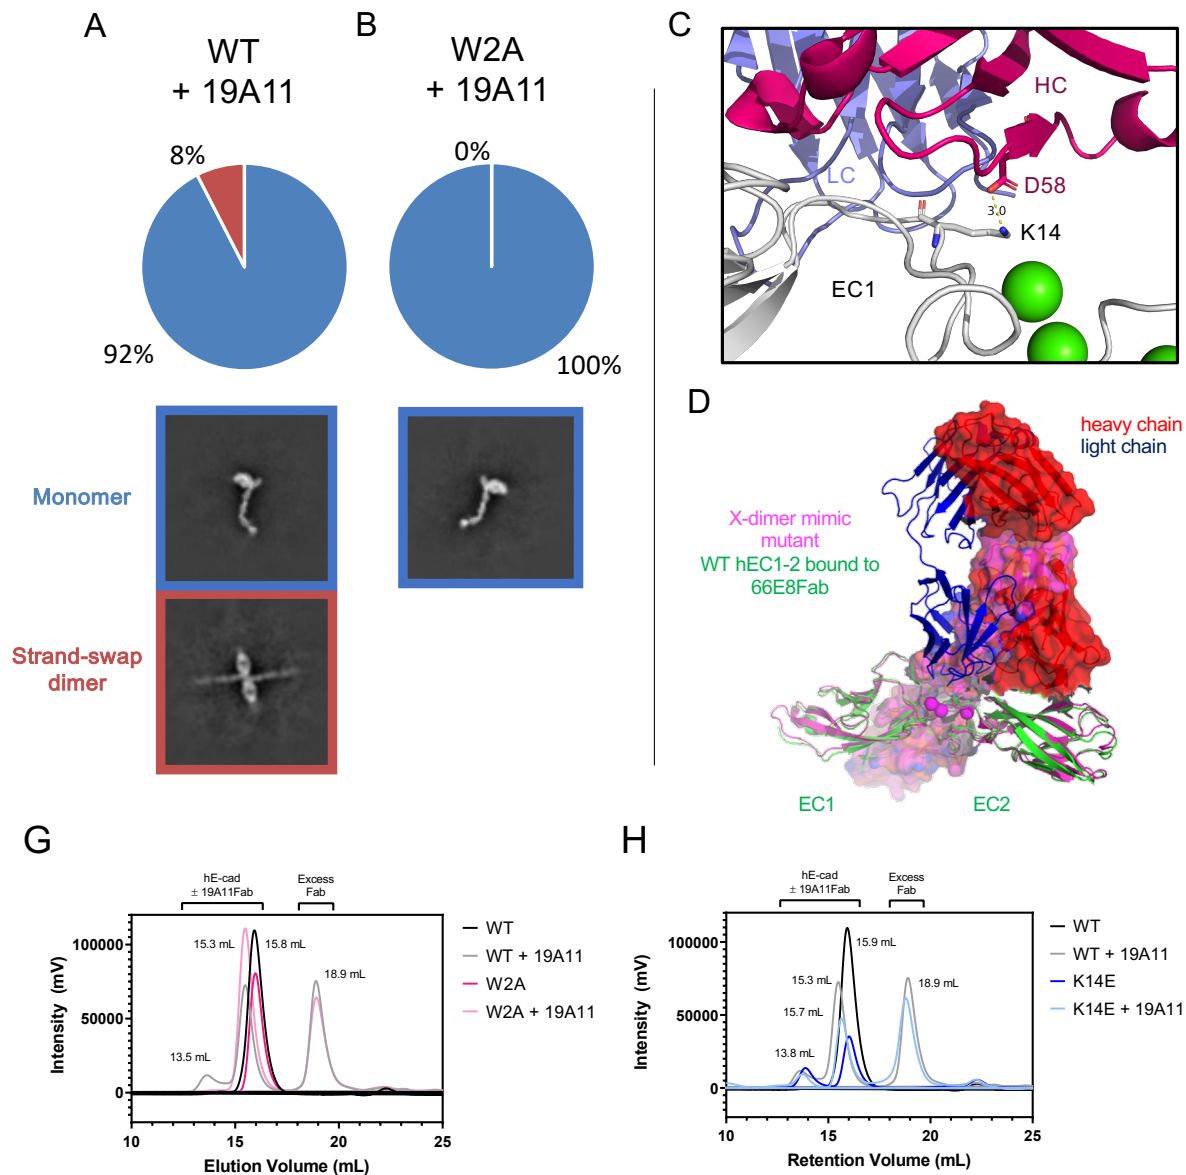

745  
 746  
 747  
 748  
 749  
 750  
 751  
 752  
 753  
 754  
 755  
 756  
 757

Figure 3. 19A11 activating antibody bound to E-cadherin is not seen to co-exist with X-dimer intermediate. (A) Class averages of 19A11 bound to WT full-length hE-cadherin include monomers and strand-swap dimers. (B) Class averages of 19A11 bound to W2A full-length hE-cadherin include only monomers. (C) K14 of hE-cadherin forms a salt bridge with D58 on the 19A11 heavy chain. (PDB 6CXY) (D) The heavy chain of the 66E8 activating Fab would have a massive steric clash with the theoretical X-dimer, indicated in magenta (PDB 4ZT1). (G) In SEC, 19A11Fab binding to hEC1-5 triggers the formation of a strand-swap dimer peak, blocked by the W2A mutation. (H) 19A11 Fab bound to hEC1-5 WT shows an analogous peak pattern to hEC1-5 K14E, the X-dimer blocking mutant.



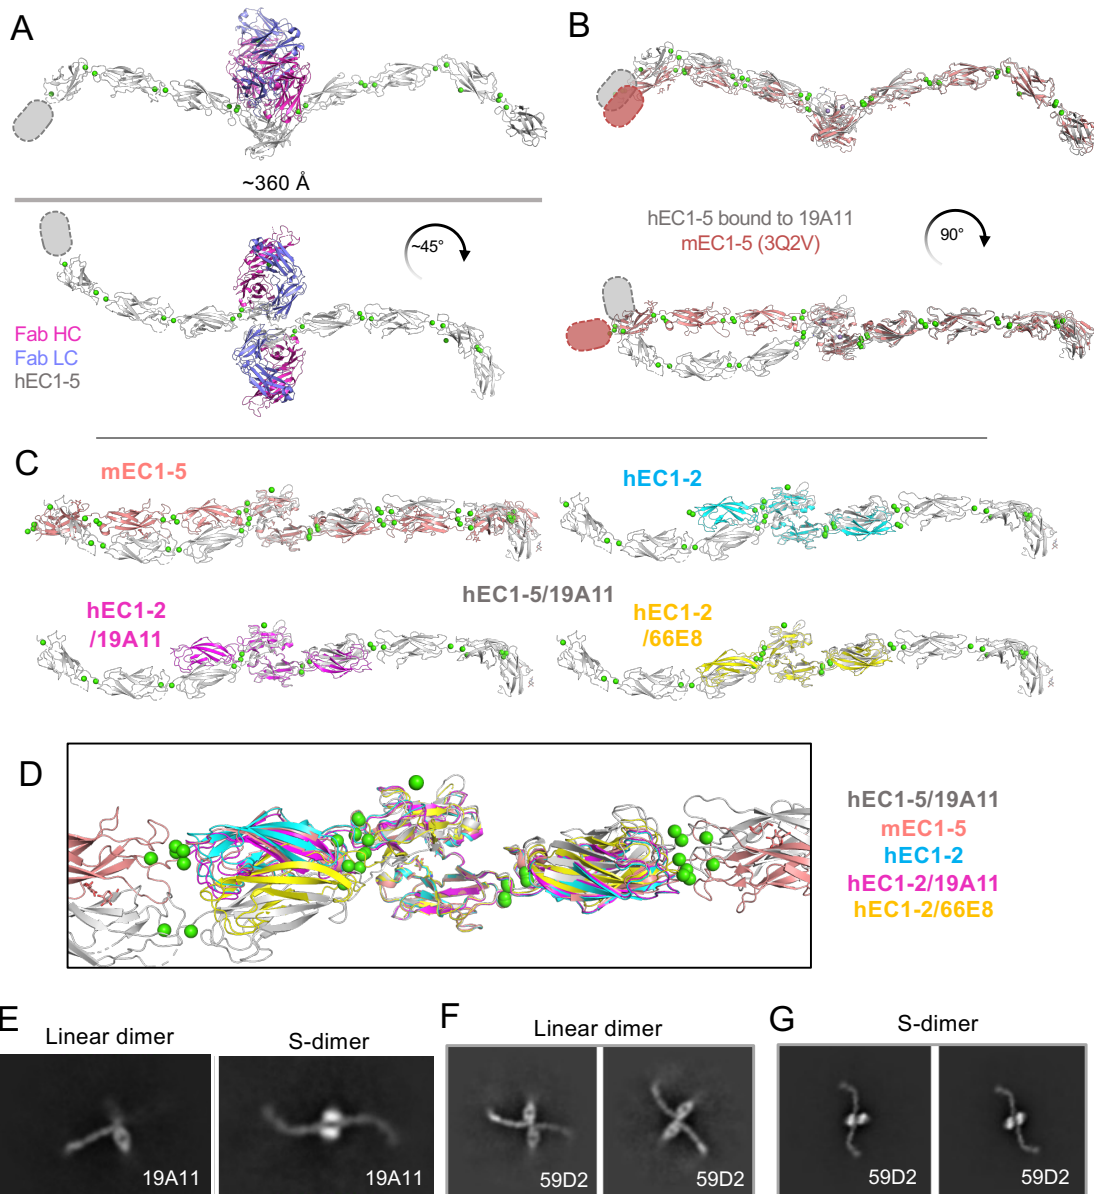

758  
759

760 Figure 4. Activating antibody reveals a novel, tightened “S” dimer conformation in  
 761 human E-cadherin, influenced by Trp2 positioning as well as a EC1-2 Ca<sup>2+</sup> site bend.  
 762 (A) Overall crystal structure of hEC1-5/19A11Fab dimers, highlighting twisted  
 763 conformation. Missing EC5 density indicated with ovals. (B) hEC1-5 bound to 19A11  
 764 with one monomer aligned with mouse EC1-5 (PDB 3q2v); Fabs removed for clarity. (C)  
 765 Comparison of hEC1-5/19A11 dimer orientation with other E-cadherin structures. EC1  
 766 of the right monomer was aligned on each. (D) All EC1 alignment dimer structures  
 767 overlaid. (E) Both straight and twisted strand-swap dimers seen in dataset of 19A11Fab  
 768 bound to the complete cadherin-catenin complex. (F) Class averages of activating Fab  
 769 59D2 with hE-cadherin indicate canonical strand-swap dimer (G) Class averages of  
 770 59D2 with full cadherin-catenin complex show the twisted strand-swap conformation.

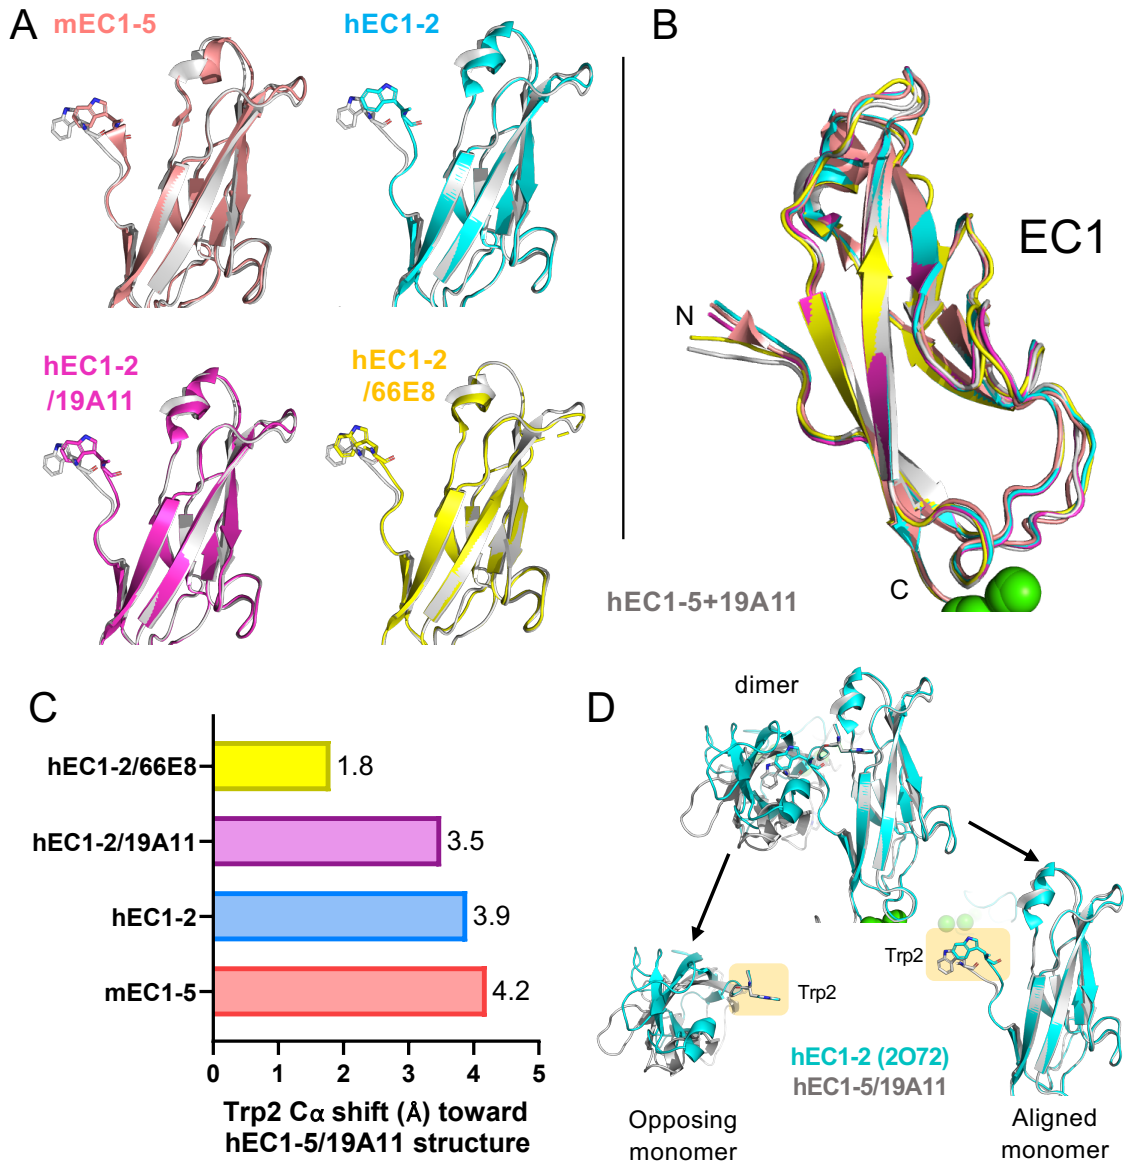

772

773

774 Figure 5. Comparison of Trp2 position with other E-cadherin structures. (A) Individual  
 775 EC1 structures compared to 19A11/hEC1-5. The Trp2 residue is highlighted. Opposing  
 776 dimers, as well as Fabs in Fab-bound structures removed for clarity. (B) All EC1  
 777 structures overlaid. (C) Inward shift of Trp2 C $\alpha$  compared to hEC1-5/19A11 structure.  
 778 (D) Comparison of hEC1-5/19A11 strand-swap and hEC1-2 strand swap. Monomer 2 is  
 779 aligned in each. The Trp in monomer 1 does not move, but the EC1 shifts, and vice-  
 780 versa in monomer 2.

781

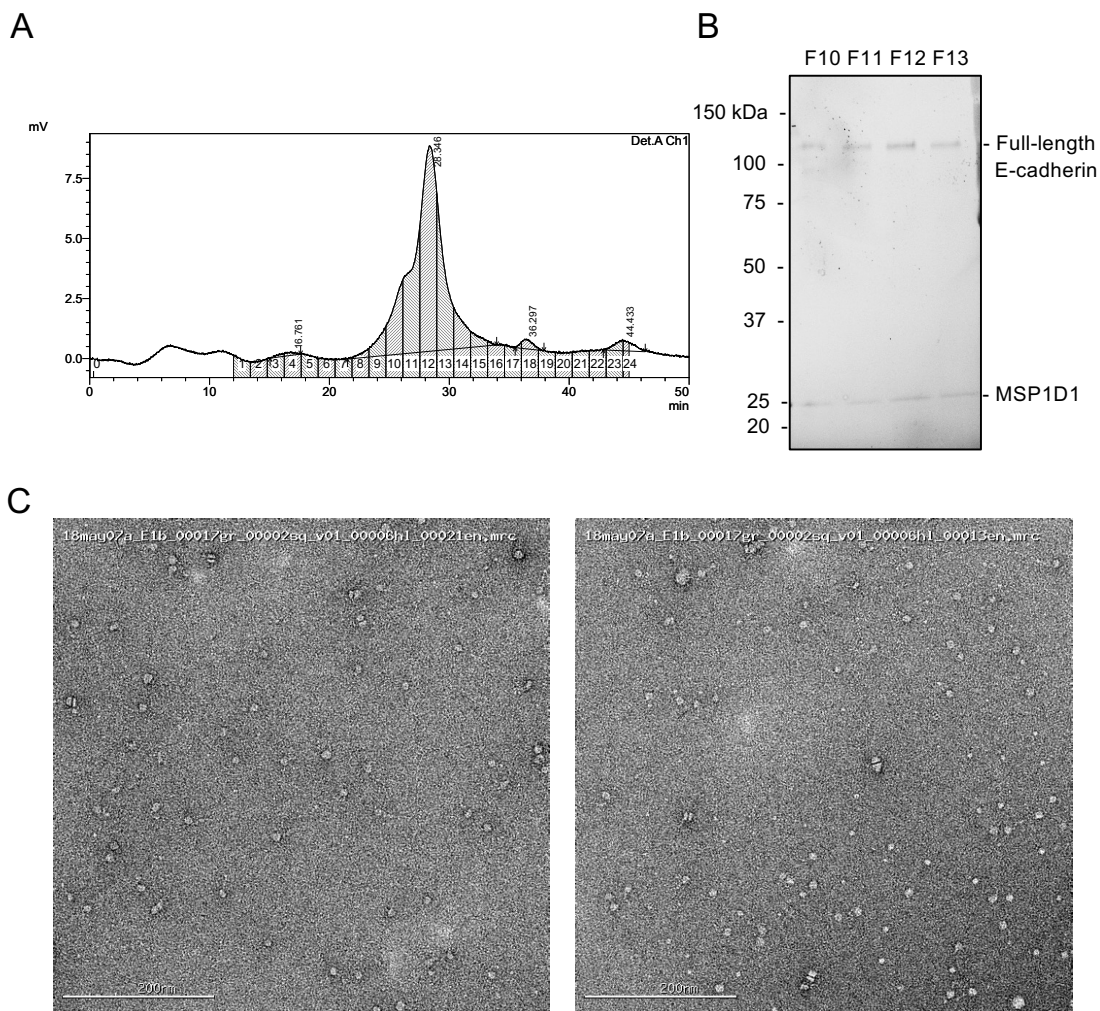

782  
 783  
 784 Extended Data Figure 1. Full-length E-cadherin is embedded in MSP1D1 nanodiscs. (A)  
 785 SEC chromatogram of FL-hE-cadherin nanodiscs. (B) SDS-PAGE gel of SEC peak  
 786 fractions indicating presence of E-cadherin and MSP1D1 membrane scaffold protein (C)  
 787 Negative stain EM micrographs of E-cadherin nanodiscs. Minor stacking is evident from  
 788 the calcium content in the buffer.  
 789

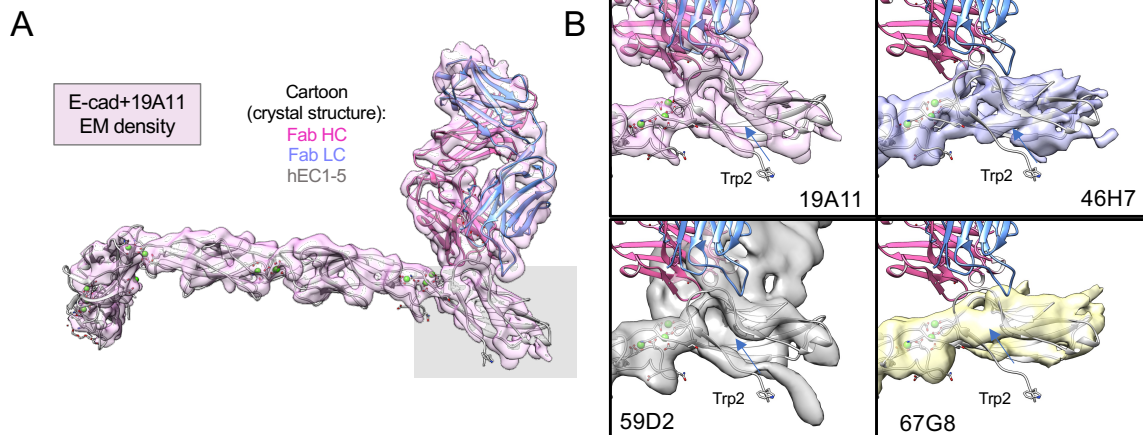

790

791

792 Extended Data Figure 2. EM reconstructions of activating and non-activating Fabs have  
 793 variations in EC1 density. (A) Overlay of monomeric EM reconstruction and crystal  
 794 structure of hEC1-5/19A11. Grey box highlights general EC1 region examined in (B).

795 Closeups of EC1 with each Fab bound, overlaid with EC1-5/19A11 structure to indicate  
 796 location of beta strand and Trp2. The arrow indicates the location of the hydrophobic  
 797 pocket.

798

799  
800

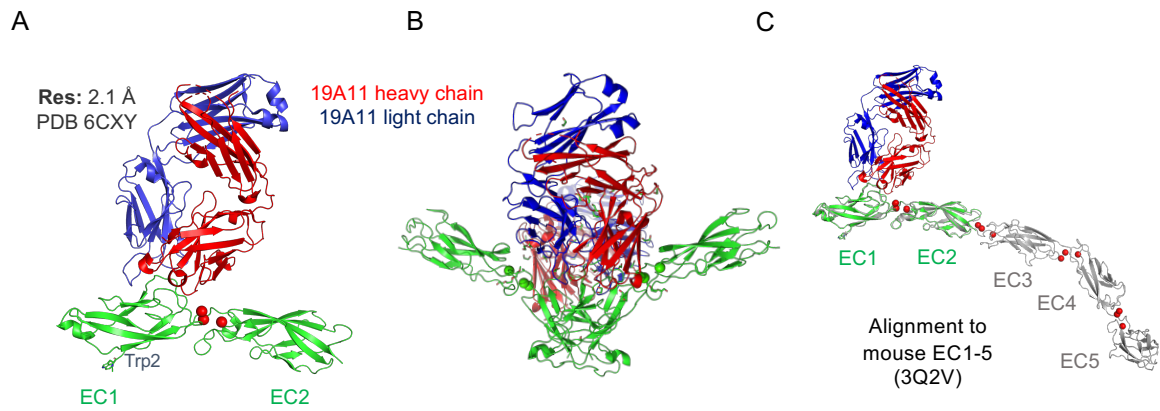

801  
802  
803  
804  
805  
806  
807

Extended Data Figure 3. Crystal structure of hEC1-2/19A11 activating Fab. (A) Asymmetric unit of crystal structure indicating Fab epitope in EC1. (B) Strand-swap dimer seen in crystal expansion (C) Overlay with mouse EC1-5 PDB indicating epitope location in full ectodomain.

808  
809

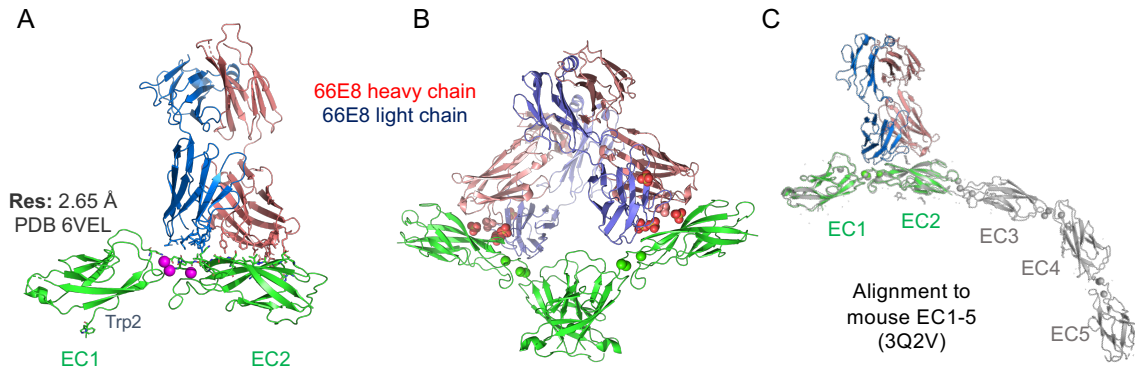

810  
811  
812  
813  
814  
815  
816

Extended Data Figure 4. Crystal structure of hEC1-2/66E8 activating Fab. (A) Asymmetric unit of crystal structure indicating Fab epitope in EC2 and the EC1-2 Ca binding site. (B) Strand-swap dimer seen in crystal expansion (C) Overlay with mouse EC1-5 PDB indicating epitope location in full ectodomain.

817  
818

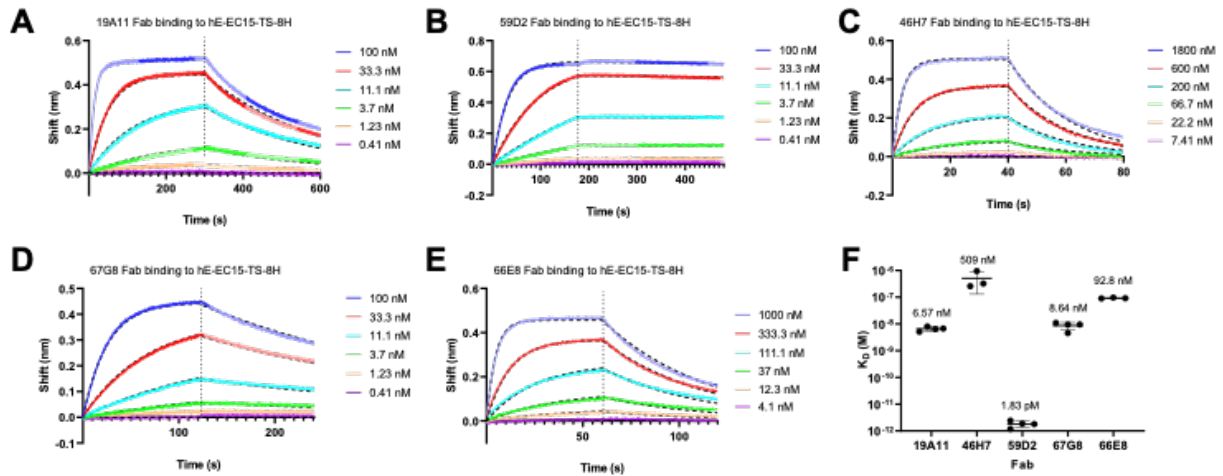

819  
820  
821  
822  
823  
824  
825

Extended Data Figure 5. BLI kinetics of Fabs binding to hEC15-TS-8His. (A) 19A11 Fab binding curve. (B) 59D2 Fab binding curve. (C) 46H7 binding curve. (D) 67G8 binding curve. (E) 66E8 binding curve (F) summary of individual measurements. Mean  $K_D$  labeled for each Fab.

826  
827

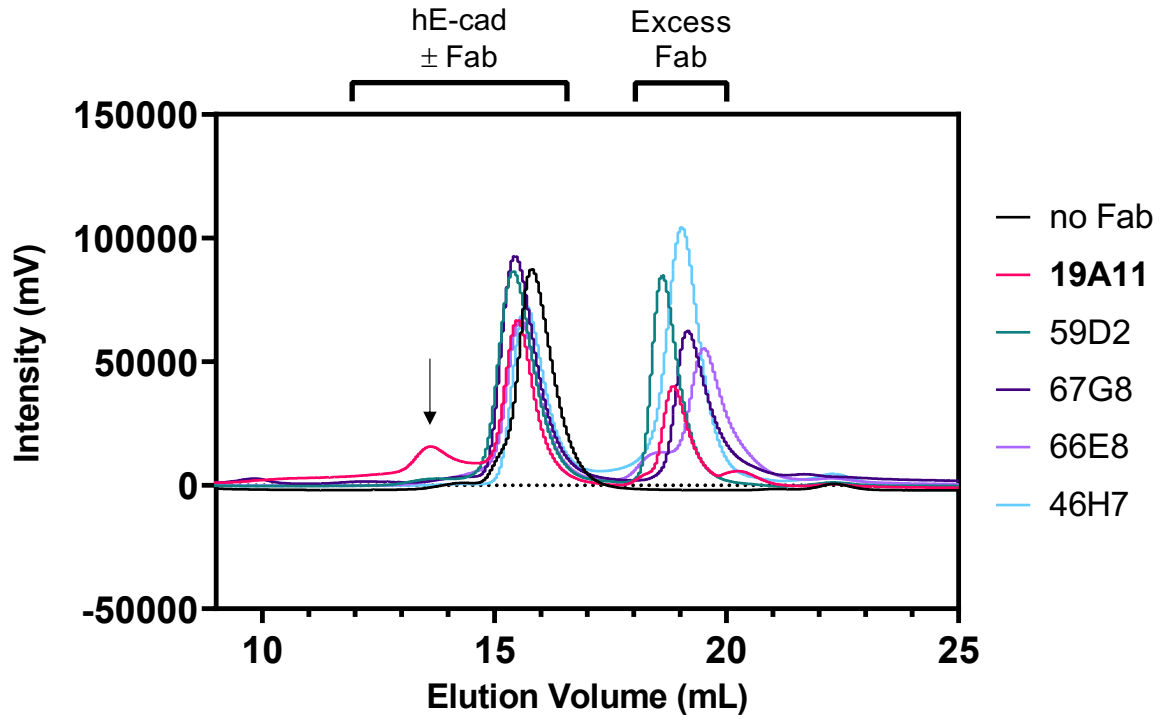

828  
829  
830  
831  
832

Extended Data Figure 6. SEC of all recombinant functional antibodies bound to hEC1-5 shows that 19A11 is prominent in its formation of a hEC1-5 dimer peak.



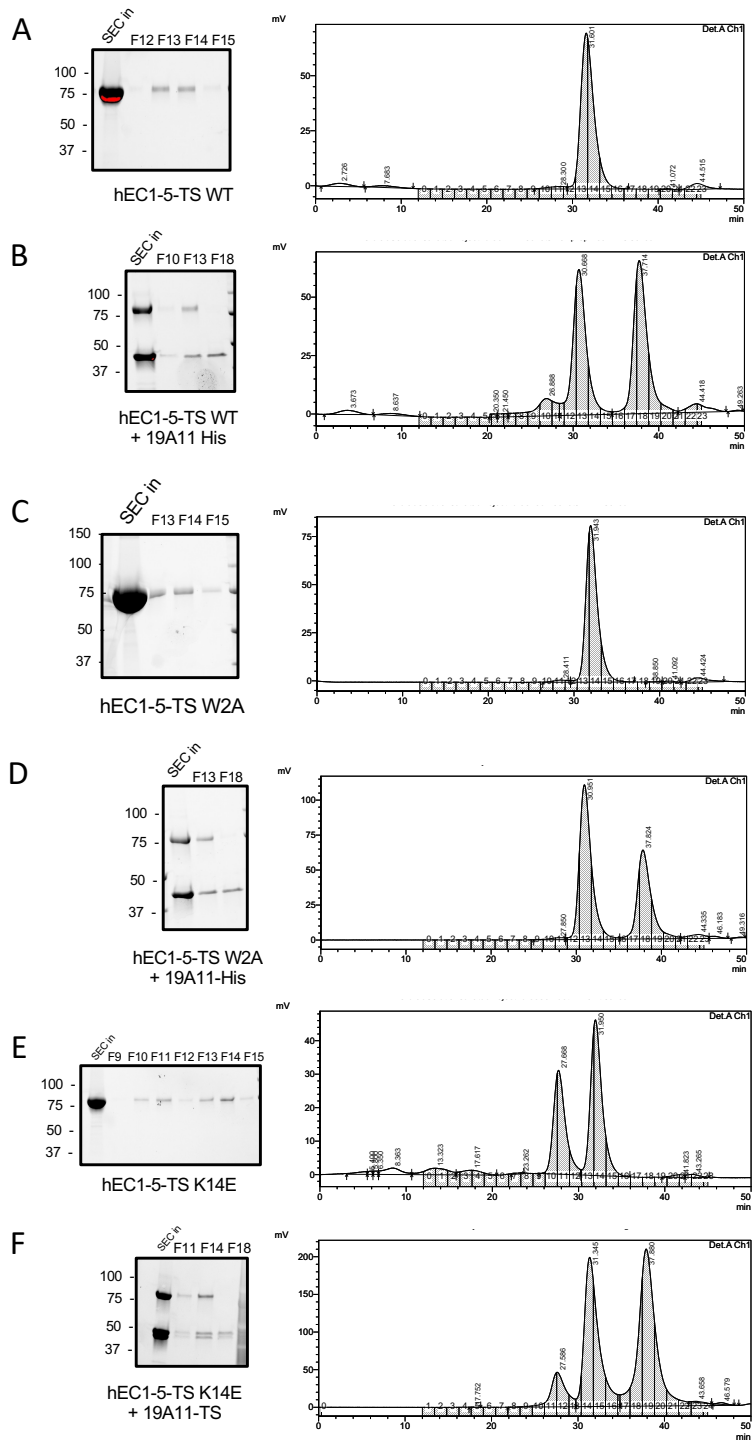

833  
834

835 Extended Data Figure 7. Individual raw SEC chromatograms and gels of fractions of  
836 human E-cadherin ectodomain Twin Strep (hEC1-5-TS) mutants bound to 19A11 Fab.

837 (A) hEC1-5-TS WT alone (B) hEC1-5 TS WT mixed with and excess of 19A11 Fab. (C)  
838 hEC1-5 TS W2A strand-swap deficient mutant. (D) hEC1-5 TS W2A mixed with and  
839 excess of 19A11 Fab. (E) hEC1-5 TS K14E X-dimer blocking mutant alone. (F) hEC1-5  
840 TS K14E mixed with an excess of 19A11 Fab.  
841

842  
843

A

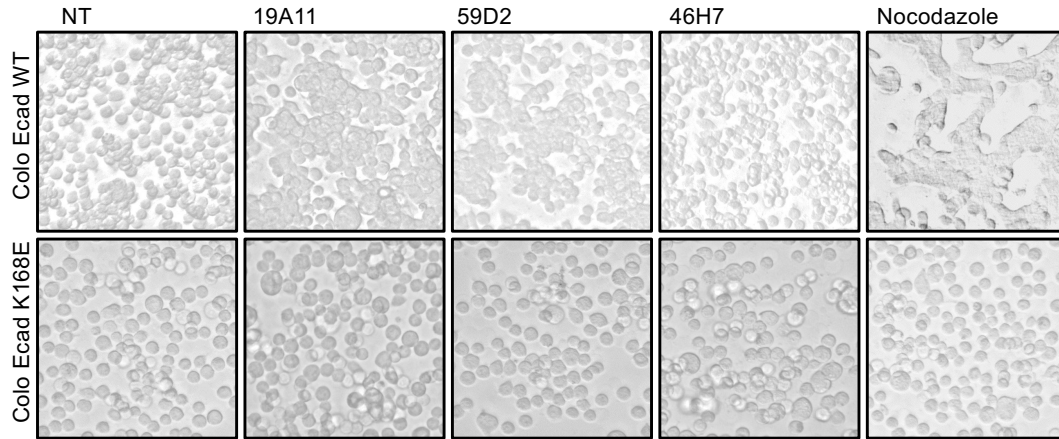

B

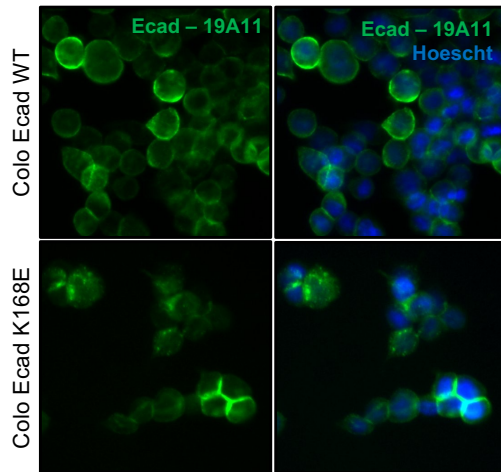

C

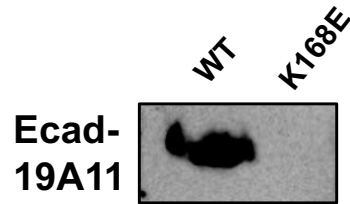

844  
845  
846  
847  
848  
849  
850  
851  
852  
853

Extended Data Figure 8. Colo205 activation with K14E/K168E E-cadherin is not rescued by 19A11. (A) Colo205 activation assay of WT E-cadherin expressing cells and K168E E-cadherin cells with full mAb treatment. NT = no treatment. (B) Immunofluorescence staining of WT and K168E E-cadherin Colo205 cells with 19A11 full mAb. (C) Western blot of Colo205 cell lysates expressing either WT E-cadherin or K168E.

854 **References**

- 855 1. Takeichi, M. Cadherins: A Molecular Family Important in Selective Cell-Cell  
856 Adhesion. *Annu. Rev. Biochem.* **59**, 237–252 (1990).
- 857 2. Takeichi, M. Morphogenetic roles of classic cadherins. *Curr. Opin. Cell Biol.* **7**,  
858 619–627 (1995).
- 859 3. Gumbiner, B. M. Classical Cadherins. in *The Cadherin Superfamily* 41–69  
860 (Springer Japan, 2016). doi:10.1007/978-4-431-56033-3\_3.
- 861 4. Gumbiner, B. M. Regulation of cadherin-mediated adhesion in morphogenesis.  
862 *Nat Rev Mol Cell Biol* **6**, 622–634 (2005).
- 863 5. Takeichi, M. Dynamic contacts: rearranging adherens junctions to drive epithelial  
864 remodelling. *Nat Rev Mol Cell Biol* **15**, 397–410 (2014).
- 865 6. Nishimura, T. & Takeichi, M. Chapter 2 Remodeling of the Adherens Junctions  
866 During Morphogenesis. in *Current Topics in Developmental Biology* 33–54  
867 (Elsevier, 2009). doi:10.1016/s0070-2153(09)89002-9.
- 868 7. Coskun, M. Intestinal Epithelium in Inflammatory Bowel Disease . *Frontiers in*  
869 *Medicine* vol. 1 24 (2014).
- 870 8. Bandyopadhyay, C., Schecterson, L. & Gumbiner, B. M. E-cadherin activating  
871 antibodies limit barrier dysfunction and inflammation in mouse inflammatory bowel  
872 disease. *Tissue Barriers* 1940741 (2021) doi:10.1080/21688370.2021.1940741.
- 873 9. Onder, T. T. *et al.* Loss of E-Cadherin Promotes Metastasis via Multiple  
874 Downstream Transcriptional Pathways. *Cancer Res.* **68**, 3645–3654 (2008).
- 875 10. Rodriguez, F. J., Lewis-Tuffin, L. J. & Anastasiadis, P. Z. E-cadherin’s dark side:  
876 Possible role in tumor progression. *Biochim. Biophys. Acta - Rev. Cancer* **1826**,

- 877 23–31 (2012).
- 878 11. Frebourg, T. Cleft lip/palate and CDH1/E-cadherin mutations in families with  
879 hereditary diffuse gastric cancer. *J. Med. Genet.* **43**, 138–142 (2005).
- 880 12. Yu, W., Yang, L., Li, T. & Zhang, Y. Cadherin Signaling in Cancer: Its Functions  
881 and Role as a Therapeutic Target . *Frontiers in Oncology* vol. 9 989 (2019).
- 882 13. Benusiglio, P. R. *et al.* CDH1 germline mutations and the hereditary diffuse  
883 gastric and lobular breast cancer syndrome: a multicentre study. *J. Med. Genet.*  
884 **50**, 486 LP – 489 (2013).
- 885 14. Mendonsa, A. M., Na, T.-Y. & Gumbiner, B. M. E-cadherin in contact inhibition  
886 and cancer. *Oncogene* **37**, 4769–4780 (2018).
- 887 15. Corso, G. & Roviello, F. *Spotlight on familial and hereditary gastric cancer.*  
888 (Springer, 2013).
- 889 16. Canel, M., Serrels, A., Frame, M. C. & Brunton, V. G. E-cadherin–integrin  
890 crosstalk in cancer invasion and metastasis. *J. Cell Sci.* **126**, 393–401 (2013).
- 891 17. Petrova, Y. I., Spano, M. M. & Gumbiner, B. M. Conformational epitopes at  
892 cadherin calcium-binding sites and p120-catenin phosphorylation regulate cell  
893 adhesion. *Mol. Biol. Cell* **23**, 2092–2108 (2012).
- 894 18. Shashikanth, N. *et al.* Allosteric Regulation of E-Cadherin Adhesion. *J. Biol.*  
895 *Chem.* **290**, 21749–21761 (2015).
- 896 19. Petrova, Y. I., Schecterson, L. & Gumbiner, B. M. Roles for E-cadherin cell  
897 surface regulation in cancer. *Mol. Biol. Cell* **27**, 3233–3244 (2016).
- 898 20. Na, T.-Y., Schecterson, L., Mendonsa, A. M. & Gumbiner, B. M. The functional  
899 activity of E-cadherin controls tumor cell metastasis at multiple steps. *Proc. Natl.*

- 900 *Acad. Sci.* **117**, 5931–5937 (2020).
- 901 21. Saito, M., Tucker, D. K., Kohlhorst, D., Niessen, C. M. & Kowalczyk, A. P.  
902 Classical and desmosomal cadherins at a glance. *J. Cell Sci.* **125**, 2547–2552  
903 (2012).
- 904 22. Harrison, O. J. *et al.* The extracellular architecture of adherens junctions revealed  
905 by crystal structures of type I cadherins. *Structure* **19**, 244–256 (2011).
- 906 23. Shapiro, L. & Weis, W. I. Structure and Biochemistry of Cadherins and Catenins.  
907 *Cold Spring Harb. Perspect. Biol.* **1**, a003053–a003053 (2009).
- 908 24. Pokutta, S. & Weis, W. I. Structure and Mechanism of Cadherins and Catenins in  
909 Cell-Cell Contacts. *Annu. Rev. Cell Dev. Biol.* **23**, 237–261 (2007).
- 910 25. Thompson, C. J., Vu, V. H., Leckband, D. E. & Schwartz, D. K. Cadherin cis and  
911 trans interactions are mutually cooperative. *Proc. Natl. Acad. Sci.* **118**,  
912 e2019845118 (2021).
- 913 26. Thompson, C. J. *et al.* Cadherin clusters stabilized by a combination of specific  
914 and nonspecific cis-interactions. *Elife* **9**, (2020).
- 915 27. Strale, P.-O. *et al.* The formation of ordered nanoclusters controls cadherin  
916 anchoring to actin and cell–cell contact fluidity. *J. Cell Biol.* **210**, 333–346 (2015).
- 917 28. Vu, V. *et al.* P120 catenin potentiates constitutive E-cadherin dimerization at the  
918 plasma membrane and regulates trans binding. *Curr. Biol.* (2021)  
919 doi:<https://doi.org/10.1016/j.cub.2021.04.061>.
- 920 29. Xu, L., Hu, T.-T. & Luo, S.-Z. Leucine Zipper Motif Drives the Transmembrane  
921 Domain Dimerization of E-cadherin. *Int. J. Pept. Res. Ther.* **20**, 95–102 (2014).
- 922 30. Shapiro, L. *et al.* Structural basis of cell-cell adhesion by cadherins. *Nature* **374**,

- 923 327–337 (1995).
- 924 31. Harrison, O. J. *et al.* Two-step adhesive binding by classical cadherins. *Nat Struct*  
925 *Mol Biol* **17**, 348–357 (2010).
- 926 32. Shapiro, L. Structure and Function of Cadherin Extracellular Regions. in *The*  
927 *Cadherin Superfamily* 71–91 (Springer Japan, 2016). doi:10.1007/978-4-431-  
928 56033-3\_4.
- 929 33. Kudo, S., Caaveiro, J. M. M. & Tsumoto, K. Adhesive Dimerization of Human P-  
930 Cadherin Catalyzed by a Chaperone-like Mechanism. *Structure* **24**, 1523–1536  
931 (2016).
- 932 34. Kudo, S. *et al.* Identification and Characterization of the X-Dimer of Human P-  
933 Cadherin: Implications for Homophilic Cell Adhesion. *Biochemistry* **53**, 1742–1752  
934 (2014).
- 935 35. Vendome, J. *et al.* Structural and energetic determinants of adhesive binding  
936 specificity in type I cadherins. *Proc. Natl. Acad. Sci.* **111**, E4175–E4184 (2014).
- 937 36. Denisov, I. G. & Sligar, S. G. Nanodiscs for structural and functional studies of  
938 membrane proteins. *Nat Struct Mol Biol* **23**, 481–486 (2016).
- 939 37. Ritchie, T. K. *et al.* Reconstitution of Membrane Proteins in Phospholipid Bilayer  
940 Nanodiscs. *Methods Enzymol.* **464**, 211–231 (2009).
- 941 38. Maker, A. & Gumbiner, B. M. Reconstitution of the full transmembrane cadherin-  
942 catenin complex. *Protein Expr. Purif.* **193**, 106056 (2022).
- 943 39. Manibog, K. *et al.* Molecular determinants of cadherin ideal bond formation:  
944 Conformation-dependent unbinding on a multidimensional landscape. *Proc. Natl.*  
945 *Acad. Sci.* **113**, E5711–E5720 (2016).

- 946 40. Vendome, J. *et al.* Molecular design principles underlying  $\beta$ -strand swapping in  
947 the adhesive dimerization of cadherins. *Nat. Struct. Mol. Biol.* **18**, 693–700 (2011).
- 948 41. Kudo, S. *et al.* Disruption of cell adhesion by an antibody targeting the cell-  
949 adhesive intermediate (X-dimer) of human P-cadherin. *Sci. Rep.* **7**, 39518 (2017).
- 950 42. Hong, S., Troyanovsky, R. B. & Troyanovsky, S. M. Cadherin exits the junction by  
951 switching its adhesive bond. *J. Cell Biol.* **192**, 1073–1083 (2011).
- 952 43. Koirala, R. *et al.* Inside-out regulation of E-cadherin conformation and adhesion.  
953 *Proc. Natl. Acad. Sci.* **118**, e2104090118 (2021).
- 954 44. Carvalho, S. *et al.* Preventing E-cadherin aberrant N-glycosylation at Asn-554  
955 improves its critical function in gastric cancer. *Oncogene* **35**, 1619–1631 (2016).
- 956 45. Kane, D. A., Mcfarland, K. N. & Warga, R. M. Mutations in half baked/E-cadherin  
957 block cell behaviors that are necessary for teleost epiboly. *Development* **132**,  
958 1105–1116 (2005).
- 959 46. Sivasankar, S., Gumbiner, B. & Leckband, D. Direct Measurements of Multiple  
960 Adhesive Alignments and Unbinding Trajectories between Cadherin Extracellular  
961 Domains. *Biophys. J.* **80**, 1758–1768 (2001).
- 962 47. Carragher, B. *et al.* Legion: An Automated System for Acquisition of Images from  
963 Vitreous Ice Specimens. *J. Struct. Biol.* **132**, 33–45 (2000).
- 964 48. Zivanov, J. *et al.* New tools for automated high-resolution cryo-EM structure  
965 determination in RELION-3. *Elife* **7**, (2018).
- 966 49. Punjani, A., Rubinstein, J. L., Fleet, D. J. & Brubaker, M. A. cryoSPARC:  
967 algorithms for rapid unsupervised cryo-EM structure determination. *Nat. Methods*  
968 **14**, 290–296 (2017).



- 969 50. Wagner, T. *et al.* SPHIRE-crYOLO is a fast and accurate fully automated particle  
970 picker for cryo-EM. *Commun. Biol.* **2**, (2019).
- 971 51. Billesbølle, C. B. *et al.* Structure of hepcidin-bound ferroportin reveals iron  
972 homeostatic mechanisms. *Nature* **586**, 807–811 (2020).
- 973 52. Asarnow, D., Palovcak, E., Cheng, Y. No Title. *UCSF pyem v0.5*. doi:Zenodo  
974 <https://doi.org/10.5281/zenodo.3576630>.
- 975 53. Grant, T., Rohou, A. & Grigorieff, N. cisTEM, user-friendly software for single-  
976 particle image processing. *Elife* **7**, (2018).
- 977 54. Tan, Y. Z. *et al.* Addressing preferred specimen orientation in single-particle cryo-  
978 EM through tilting. *Nat. Methods* **14**, 793–796 (2017).
- 979
